# Supplementary material
Source: publisher figshare collection journal article supplement (https://tandf.figshare.com/articles/dataset/_/4822102)
Supplement: Supplementary file 1 [file 2]

## Supplementary Figure 2

**A**

B

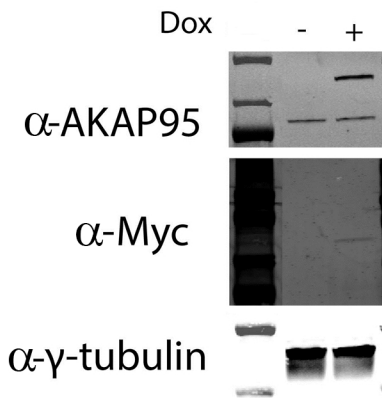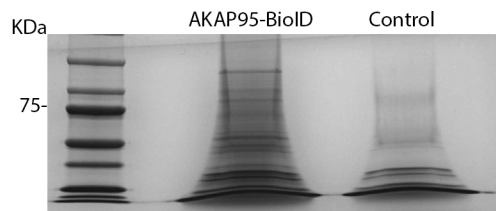

C

P12270|TPR\_HUMAN (100%), 267 289,3 Da  
Nucleoprotein TPR OS=Homo sapiens GN=TPR PE=1 SV=3  
76 exclusive unique peptides, 116 exclusive unique spectra, 184 total spectra, 850/2363 amino acids (36% coverage)

[illegible]
