# Supplementary material
Source: publisher figshare collection journal article supplement (https://tandf.figshare.com/articles/dataset/_/4822102)
Supplement: Supplementary file 3 [file 2]

| Identified Proteins (428)                                                                                        | Accession Number        | Molecular Weight | Unique peptides |                  | Observable peptides | <a href="http://www.mcponline.org/content/4/9/1265.long">http://www.mcponline.org/content/4/9/1265.long</a> |                        |
|------------------------------------------------------------------------------------------------------------------|-------------------------|------------------|-----------------|------------------|---------------------|-------------------------------------------------------------------------------------------------------------|------------------------|
|                                                                                                                  |                         |                  | Control         | Myc-BirA*-AKAP95 |                     | emPAI_Control                                                                                               | emPAI_Myc-BirA*-AKAP95 |
| Nucleoprotein TPR OS=Homo sapiens GN=TPR PE=1 SV=3                                                               | P12270 TPR_HUMAN        | 267 kDa          | 0               | 78               | 193                 | 0                                                                                                           | 1,54                   |
| Bifunctional protein BirA OS=Escherichia coli (strain K12) GN=birA PE=1 SV=1                                     | P06709 BIRA_ECOLI       | 35 kDa           | 0               | 10               | 26                  | 0                                                                                                           | 1,42                   |
| Transgelin-2 OS=Homo sapiens GN=TAGLN2 PE=1 SV=3                                                                 | P37802 TAGL2_HUMAN      | 22 kDa           | 0               | 6                | 17                  | 0                                                                                                           | 1,29                   |
| Eukaryotic translation initiation factor 3 subunit E OS=Homo sapiens GN=EIF3E PE=1 SV=1                          | P60228 EIF3E_HUMAN      | 52 kDa           | 0               | 13               | 38                  | 0                                                                                                           | 1,19                   |
| U2 small nuclear ribonucleoprotein A' OS=Homo sapiens GN=SNRPA1 PE=1 SV=2                                        | P09661 RU2A_HUMAN       | 28 kDa           | 0               | 7                | 21                  | 0                                                                                                           | 1,16                   |
| Dual specificity protein phosphatase 3 OS=Homo sapiens GN=DUSP3 PE=1 SV=1                                        | P51452 DUS3_HUMAN       | 20 kDa           | 0               | 5                | 15                  | 0                                                                                                           | 1,13                   |
| A-kinase anchor protein 8 OS=Homo sapiens GN=AKAP8 PE=1 SV=1                                                     | O43823 AKAP8_HUMAN      | 76 kDa           | 0               | 17               | 55                  | 0                                                                                                           | 1,02                   |
| Ubiquitin thioesterase OTUB1 OS=Homo sapiens GN=OTUB1 PE=1 SV=2                                                  | Q96FW1 OTUB1_HUMAN      | 31 kDa           | 0               | 7                | 23                  | 0                                                                                                           | 1,01                   |
| ATP synthase subunit O, mitochondrial OS=Homo sapiens GN=ATP5O PE=1 SV=1                                         | P48047 ATPO_HUMAN       | 23 kDa           | 0               | 5                | 17                  | 0                                                                                                           | 0,94                   |
| 14-3-3 protein theta OS=Homo sapiens GN=YWHAQ PE=1 SV=1                                                          | P27348 1433T_HUMAN      | 28 kDa           | 0               | 6                | 21                  | 0                                                                                                           | 0,93                   |
| Annexin A4 OS=Homo sapiens GN=ANXA4 PE=1 SV=4                                                                    | P09525 ANXA4_HUMAN      | 36 kDa           | 0               | 7                | 27                  | 0                                                                                                           | 0,83                   |
| Sorting nexin-12 OS=Homo sapiens GN=SNX12 PE=1 SV=3                                                              | Q9UMY4 SNX12_HUMAN      | 20 kDa           | 0               | 4                | 15                  | 0                                                                                                           | 0,83                   |
| Exportin-1 OS=Homo sapiens GN=XPO1 PE=1 SV=1                                                                     | O14980 XPO1_HUMAN       | 123 kDa          | 0               | 23               | 89                  | 0                                                                                                           | 0,81                   |
| Cleavage and polyadenylation specificity factor subunit 5 OS=Homo sapiens GN=NUDT21 PE=1 SV=1                    | O43809 CPSF5_HUMAN      | 26 kDa           | 0               | 5                | 20                  | 0                                                                                                           | 0,8                    |
| 26S proteasome non-ATPase regulatory subunit 13 OS=Homo sapiens GN=PSMD13 PE=1 SV=2                              | Q9UNM6 PSD13_HUMAN      | 43 kDa           | 0               | 8                | 32                  | 0                                                                                                           | 0,79                   |
| Chromobox protein homolog 3 OS=Homo sapiens GN=CBX3 PE=1 SV=4                                                    | Q13185 CBX3_HUMAN       | 21 kDa           | 0               | 4                | 16                  | 0                                                                                                           | 0,78                   |
| BolA-like protein 2 OS=Homo sapiens GN=BOLA2 PE=1 SV=1                                                           | Q9H3K6 BOLA2_HUMAN      | 10 kDa           | 0               | 2                | 8                   | 0                                                                                                           | 0,77                   |
| Nicotinamide phosphoribosyltransferase OS=Homo sapiens GN=NAMPT PE=1 SV=1                                        | P43490 NAMPT_HUMAN      | 56 kDa           | 0               | 10               | 41                  | 0                                                                                                           | 0,75                   |
| 40S ribosomal protein S17 OS=Homo sapiens GN=RPS17 PE=1 SV=2                                                     | P08708 RS17_HUMAN (+1)  | 16 kDa           | 0               | 3                | 12                  | 0                                                                                                           | 0,75                   |
| Leucine-rich repeat-containing protein 59 OS=Homo sapiens GN=LRRC59 PE=1 SV=1                                    | Q96AG4 LRC59_HUMAN      | 35 kDa           | 0               | 6                | 26                  | 0                                                                                                           | 0,7                    |
| Cytosolic Fe-S cluster assembly factor NUBP2 OS=Homo sapiens GN=NUBP2 PE=1 SV=1                                  | Q9Y5Y2 NUBP2_HUMAN      | 29 kDa           | 0               | 5                | 22                  | 0                                                                                                           | 0,7                    |
| Nucleoside diphosphate kinase B OS=Homo sapiens GN=NME2 PE=1 SV=1                                                | P22392 NDKB_HUMAN       | 17 kDa           | 0               | 3                | 13                  | 0                                                                                                           | 0,7                    |
| Importin subunit beta-1 OS=Homo sapiens GN=KPNB1 PE=1 SV=2                                                       | Q14974 IMB1_HUMAN       | 97 kDa           | 0               | 16               | 71                  | 0                                                                                                           | 0,69                   |
| Protein dpy-30 homolog OS=Homo sapiens GN=DPY30 PE=1 SV=1                                                        | Q9C005 DPY30_HUMAN      | 11 kDa           | 0               | 2                | 9                   | 0                                                                                                           | 0,69                   |
| ATP synthase subunit f, mitochondrial OS=Homo sapiens GN=ATP5J2 PE=1 SV=3                                        | P56134 ATPK_HUMAN (+1)  | 11 kDa           | 0               | 2                | 9                   | 0                                                                                                           | 0,69                   |
| Flap endonuclease 1 OS=Homo sapiens GN=FEN1 PE=1 SV=1                                                            | P39748 FEN1_HUMAN       | 43 kDa           | 0               | 7                | 32                  | 0                                                                                                           | 0,66                   |
| Probable glutathione peroxidase 8 OS=Homo sapiens GN=GPX8 PE=1 SV=2                                              | Q8TED1 GPX8_HUMAN       | 24 kDa           | 0               | 4                | 18                  | 0                                                                                                           | 0,66                   |
| Thymidylate kinase OS=Homo sapiens GN=DTYMK PE=1 SV=4                                                            | P23919 KTHY_HUMAN       | 24 kDa           | 0               | 4                | 18                  | 0                                                                                                           | 0,66                   |
| SUMO-conjugating enzyme UBC9 OS=Homo sapiens GN=UBE2I PE=1 SV=1                                                  | P63279 UBC9_HUMAN       | 18 kDa           | 0               | 3                | 14                  | 0                                                                                                           | 0,65                   |
| Eukaryotic translation initiation factor 3 subunit L OS=Homo sapiens GN=EIF3L PE=1 SV=1                          | Q9Y262 EIF3L_HUMAN      | 67 kDa           | 0               | 10               | 49                  | 0                                                                                                           | 0,6                    |
| Mitogen-activated protein kinase 1 OS=Homo sapiens GN=MAPK1 PE=1 SV=3                                            | P28482 MK01_HUMAN       | 41 kDa           | 0               | 6                | 30                  | 0                                                                                                           | 0,58                   |
| ADP-ribosylation factor-like protein 3 OS=Homo sapiens GN=ARL3 PE=1 SV=2                                         | P36405 ARL3_HUMAN       | 20 kDa           | 0               | 3                | 15                  | 0                                                                                                           | 0,57                   |
| Translationally-controlled tumor protein OS=Homo sapiens GN=TPT1 PE=1 SV=1                                       | P13693 TCTP_HUMAN       | 20 kDa           | 0               | 3                | 15                  | 0                                                                                                           | 0,57                   |
| 60S ribosomal protein L30 OS=Homo sapiens GN=RPL30 PE=1 SV=2                                                     | P62888 RL30_HUMAN       | 13 kDa           | 0               | 2                | 10                  | 0                                                                                                           | 0,57                   |
| Protein QIL1 OS=Homo sapiens GN=QIL1 PE=1 SV=1                                                                   | Q5XKP0 QIL1_HUMAN       | 13 kDa           | 0               | 2                | 10                  | 0                                                                                                           | 0,57                   |
| 60S ribosomal protein L35a OS=Homo sapiens GN=RPL35A PE=1 SV=2                                                   | P18077 RL35A_HUMAN      | 13 kDa           | 0               | 2                | 10                  | 0                                                                                                           | 0,57                   |
| 14-3-3 protein eta OS=Homo sapiens GN=YWHAH PE=1 SV=4                                                            | Q04917 1433F_HUMAN      | 28 kDa           | 0               | 4                | 21                  | 0                                                                                                           | 0,55                   |
| 40S ribosomal protein S25 OS=Homo sapiens GN=RPS25 PE=1 SV=1                                                     | P62851 RS25_HUMAN       | 14 kDa           | 0               | 2                | 11                  | 0                                                                                                           | 0,53                   |
| Nuclear mitotic apparatus protein 1 OS=Homo sapiens GN=NUMA1 PE=1 SV=2                                           | Q14980 NUMA1_HUMAN      | 238 kDa          | 0               | 31               | 172                 | 0                                                                                                           | 0,51                   |
| Flavin reductase (NADPH) OS=Homo sapiens GN=BLVRB PE=1 SV=3                                                      | P30043 BLVRB_HUMAN      | 22 kDa           | 0               | 3                | 17                  | 0                                                                                                           | 0,51                   |
| Adenylate kinase isoenzyme 1 OS=Homo sapiens GN=AK1 PE=1 SV=3                                                    | P00568 KAD1_HUMAN       | 22 kDa           | 0               | 3                | 17                  | 0                                                                                                           | 0,51                   |
| ADP-ribosylation factor-like protein 8B OS=Homo sapiens GN=ARL8B PE=1 SV=1                                       | Q9NVJ2 ARL8B_HUMAN      | 22 kDa           | 0               | 3                | 17                  | 0                                                                                                           | 0,51                   |
| Chromobox protein homolog 5 OS=Homo sapiens GN=CBX5 PE=1 SV=1                                                    | P45973 CBX5_HUMAN       | 22 kDa           | 0               | 3                | 17                  | 0                                                                                                           | 0,51                   |
| 7,8-dihydro-8-oxoguanine triphosphatase OS=Homo sapiens GN=NUDT1 PE=1 SV=3                                       | P36639 8ODP_HUMAN       | 23 kDa           | 0               | 3                | 17                  | 0                                                                                                           | 0,49                   |
| Ran-specific GTPase-activating protein OS=Homo sapiens GN=RANBP1 PE=1 SV=1                                       | P43487 RANG_HUMAN       | 23 kDa           | 0               | 3                | 17                  | 0                                                                                                           | 0,49                   |
| 28S ribosomal protein S17, mitochondrial OS=Homo sapiens GN=MRPS17 PE=1 SV=1                                     | Q9Y2R5 RT17_HUMAN       | 15 kDa           | 0               | 2                | 12                  | 0                                                                                                           | 0,49                   |
| 28S ribosomal protein S16, mitochondrial OS=Homo sapiens GN=MRPS16 PE=1 SV=1                                     | Q9Y3D3 RT16_HUMAN       | 15 kDa           | 0               | 2                | 12                  | 0                                                                                                           | 0,49                   |
| Trifunctional purine biosynthetic protein adenosine-3 OS=Homo sapiens GN=GART PE=1 SV=1                          | P22102 PUR2_HUMAN       | 108 kDa          | 0               | 13               | 79                  | 0                                                                                                           | 0,46                   |
| BAG family molecular chaperone regulator 2 OS=Homo sapiens GN=BAG2 PE=1 SV=1                                     | O95816 BAG2_HUMAN       | 24 kDa           | 0               | 3                | 18                  | 0                                                                                                           | 0,46                   |
| Retinol-binding protein 1 OS=Homo sapiens GN=RBP1 PE=1 SV=2                                                      | P09455 RET1_HUMAN       | 16 kDa           | 0               | 2                | 12                  | 0                                                                                                           | 0,45                   |
| SAP30-binding protein OS=Homo sapiens GN=SAP30BP PE=1 SV=1                                                       | Q9UHR5 S30BP_HUMAN (+1) | 34 kDa           | 0               | 4                | 25                  | 0                                                                                                           | 0,44                   |
| Sulfotransferase 1A1 OS=Homo sapiens GN=SULT1A1 PE=1 SV=3                                                        | P50225 ST1A1_HUMAN      | 34 kDa           | 0               | 4                | 25                  | 0                                                                                                           | 0,44                   |
| Interferon-inducible double stranded RNA-dependent protein kinase activator A OS=Homo sapiens GN=PRKRA PE=1 SV=1 | O75569 PRKRA_HUMAN      | 34 kDa           | 0               | 4                | 25                  | 0                                                                                                           | 0,44                   |
| EH domain-containing protein 4 OS=Homo sapiens GN=EHD4 PE=1 SV=1                                                 | Q9H223 EHD4_HUMAN       | 61 kDa           | 0               | 7                | 45                  | 0                                                                                                           | 0,43                   |
| Tyrosine--tRNA ligase, mitochondrial OS=Homo sapiens GN=YARS2 PE=1 SV=2                                          | Q9Y2Z4 SYYM_HUMAN       | 53 kDa           | 0               | 6                | 39                  | 0                                                                                                           | 0,43                   |
| Probable ATP-dependent RNA helicase DDX6 OS=Homo sapiens GN=DDX6 PE=1 SV=2                                       | P26196 DDX6_HUMAN       | 54 kDa           | 0               | 6                | 40                  | 0                                                                                                           | 0,42                   |
| Mediator of RNA polymerase II transcription subunit 19 OS=Homo sapiens GN=MED19 PE=1 SV=2                        | A0JLT2 MED19_HUMAN      | 26 kDa           | 0               | 3                | 20                  | 0                                                                                                           | 0,42                   |

|                                                                                                   |                         |         |   |    |     |   |      |
|---------------------------------------------------------------------------------------------------|-------------------------|---------|---|----|-----|---|------|
| Ribose-phosphate pyrophosphokinase 1 OS=Homo sapiens GN=PRPS1 PE=1 SV=2                           | P60891 PRPS1_HUMAN      | 35 kDa  | 0 | 4  | 26  | 0 | 0,42 |
| H/ACA ribonucleoprotein complex subunit 2 OS=Pongo abelii GN=NHP2 PE=2 SV=1                       | Q5RC65 NHP2_PONAB (+1)  | 17 kDa  | 0 | 2  | 13  | 0 | 0,42 |
| Importin-7 OS=Homo sapiens GN=IPO7 PE=1 SV=1                                                      | O95373 IPO7_HUMAN       | 120 kDa | 0 | 13 | 87  | 0 | 0,41 |
| Calcium-binding mitochondrial carrier protein Aralar2 OS=Homo sapiens GN=SLC25A13 PE=1 SV=2       | Q9UJS0 CMC2_HUMAN       | 74 kDa  | 0 | 8  | 54  | 0 | 0,41 |
| Annexin A3 OS=Homo sapiens GN=ANXA3 PE=1 SV=3                                                     | P12429 ANXA3_HUMAN      | 36 kDa  | 0 | 4  | 27  | 0 | 0,41 |
| EF-hand domain-containing protein D2 OS=Homo sapiens GN=EFHD2 PE=1 SV=1                           | Q96C19 EFHD2_HUMAN      | 27 kDa  | 0 | 3  | 20  | 0 | 0,41 |
| 26S proteasome non-ATPase regulatory subunit 6 OS=Homo sapiens GN=PSMD6 PE=1 SV=1                 | Q15008 PSMD6_HUMAN      | 46 kDa  | 0 | 5  | 34  | 0 | 0,4  |
| Peptidyl-prolyl cis-trans isomerase-like 1 OS=Homo sapiens GN=PPIL1 PE=1 SV=1                     | Q9Y3C6 PPIL1_HUMAN      | 18 kDa  | 0 | 2  | 14  | 0 | 0,4  |
| Pachytene checkpoint protein 2 homolog OS=Homo sapiens GN=TRIP13 PE=1 SV=2                        | Q15645 PCH2_HUMAN       | 49 kDa  | 0 | 5  | 36  | 0 | 0,38 |
| 14-3-3 protein epsilon OS=Homo sapiens GN=YWHAE PE=1 SV=1                                         | P62258 1433E_HUMAN      | 29 kDa  | 0 | 3  | 22  | 0 | 0,37 |
| Cofilin-2 OS=Homo sapiens GN=CFL2 PE=1 SV=1                                                       | Q9Y281 COF2_HUMAN       | 19 kDa  | 0 | 2  | 15  | 0 | 0,37 |
| Importin-5 OS=Homo sapiens GN=IPO5 PE=1 SV=4                                                      | O00410 IPO5_HUMAN       | 124 kDa | 0 | 12 | 90  | 0 | 0,36 |
| Eukaryotic translation initiation factor 3 subunit B OS=Homo sapiens GN=EIF3B PE=1 SV=3           | P55884 EIF3B_HUMAN      | 92 kDa  | 0 | 9  | 67  | 0 | 0,36 |
| SNW domain-containing protein 1 OS=Homo sapiens GN=SNW1 PE=1 SV=1                                 | Q13573 SNW1_HUMAN       | 61 kDa  | 0 | 6  | 45  | 0 | 0,36 |
| Mitochondrial import inner membrane translocase subunit TIM50 OS=Homo sapiens GN=TIMM50 PE=1 SV=2 | Q3ZCQ8 TIM50_HUMAN      | 40 kDa  | 0 | 4  | 30  | 0 | 0,36 |
| Proteasome activator complex subunit 3 OS=Homo sapiens GN=PSME3 PE=1 SV=1                         | P61289 PSME3_HUMAN      | 30 kDa  | 0 | 3  | 22  | 0 | 0,36 |
| Microtubule-associated protein RP/EB family member 1 OS=Homo sapiens GN=MAPRE1 PE=1 SV=3          | Q15691 MARE1_HUMAN      | 30 kDa  | 0 | 3  | 22  | 0 | 0,36 |
| 6-phosphofructokinase, liver type OS=Homo sapiens GN=PFKL PE=1 SV=6                               | P17858 K6PL_HUMAN       | 85 kDa  | 0 | 8  | 62  | 0 | 0,35 |
| Protein phosphatase methylesterase 1 OS=Homo sapiens GN=PPME1 PE=1 SV=3                           | Q9Y570 PPME1_HUMAN      | 42 kDa  | 0 | 4  | 31  | 0 | 0,35 |
| Myosin regulatory light chain 12B OS=Homo sapiens GN=MYL12B PE=1 SV=2                             | O14950 ML12B_HUMAN (+1) | 20 kDa  | 0 | 2  | 15  | 0 | 0,35 |
| Protein DJ-1 OS=Homo sapiens GN=PARK7 PE=1 SV=2                                                   | Q99497 PARK7_HUMAN      | 20 kDa  | 0 | 2  | 15  | 0 | 0,35 |
| Eukaryotic translation initiation factor 4 gamma 1 OS=Homo sapiens GN=EIF4G1 PE=1 SV=4            | Q04637 IF4G1_HUMAN      | 175 kDa | 0 | 16 | 127 | 0 | 0,34 |
| Eukaryotic translation initiation factor 3 subunit M OS=Homo sapiens GN=EIF3M PE=1 SV=1           | Q7L2H7 EIF3M_HUMAN      | 43 kDa  | 0 | 4  | 32  | 0 | 0,34 |
| Isoleucine--tRNA ligase, cytoplasmic OS=Homo sapiens GN=IARS PE=1 SV=2                            | P41252 SYIC_HUMAN       | 145 kDa | 0 | 13 | 105 | 0 | 0,33 |
| Cytoplasmic FMR1-interacting protein 1 OS=Homo sapiens GN=CYFIP1 PE=1 SV=1                        | Q7L576 CYFP1_HUMAN      | 145 kDa | 0 | 13 | 105 | 0 | 0,33 |
| Cancer-related nucleoside-triphosphatase OS=Homo sapiens GN=NTPCR PE=1 SV=1                       | Q9BSD7 NTPCR_HUMAN      | 21 kDa  | 0 | 2  | 16  | 0 | 0,33 |
| NAD(P) transhydrogenase, mitochondrial OS=Homo sapiens GN=NNT PE=1 SV=3                           | Q13423 NNTM_HUMAN       | 114 kDa | 0 | 10 | 83  | 0 | 0,32 |
| Splicing factor 1 OS=Homo sapiens GN=SF1 PE=1 SV=4                                                | Q15637 SF01_HUMAN       | 68 kDa  | 0 | 6  | 50  | 0 | 0,32 |
| Ras-related protein Rab-31 OS=Homo sapiens GN=RAB31 PE=1 SV=1                                     | Q13636 RAB31_HUMAN      | 22 kDa  | 0 | 2  | 17  | 0 | 0,32 |
| Alpha-soluble NSF attachment protein OS=Homo sapiens GN=NAPA PE=1 SV=3                            | P54920 SNAA_HUMAN       | 33 kDa  | 0 | 3  | 25  | 0 | 0,32 |
| 39S ribosomal protein L2, mitochondrial OS=Homo sapiens GN=MRPL2 PE=1 SV=2                        | Q5T653 RM02_HUMAN       | 33 kDa  | 0 | 3  | 25  | 0 | 0,32 |
| Ubiquitin-conjugating enzyme E2 K OS=Homo sapiens GN=UBE2K PE=1 SV=3                              | P61086 UBE2K_HUMAN      | 22 kDa  | 0 | 2  | 17  | 0 | 0,32 |
| Uncharacterized protein C7orf50 OS=Homo sapiens GN=C7orf50 PE=1 SV=1                              | Q9BRJ6 CG050_HUMAN      | 22 kDa  | 0 | 2  | 17  | 0 | 0,32 |
| DNA mismatch repair protein Msh6 OS=Homo sapiens GN=MSH6 PE=1 SV=2                                | P52701 MSH6_HUMAN       | 153 kDa | 0 | 13 | 111 | 0 | 0,31 |
| Eukaryotic translation initiation factor 3 subunit C OS=Homo sapiens GN=EIF3C PE=1 SV=1           | Q99613 EIF3C_HUMAN      | 105 kDa | 0 | 9  | 76  | 0 | 0,31 |
| Calponin-2 OS=Homo sapiens GN=CNN2 PE=1 SV=4                                                      | Q99439 CNN2_HUMAN       | 34 kDa  | 0 | 3  | 25  | 0 | 0,31 |
| Cyclin-dependent kinase 2 OS=Homo sapiens GN=CDK2 PE=1 SV=2                                       | P24941 CDK2_HUMAN       | 34 kDa  | 0 | 3  | 25  | 0 | 0,31 |
| FACT complex subunit SPT16 OS=Homo sapiens GN=SUPT16H PE=1 SV=1                                   | Q9Y5B9 SP16H_HUMAN      | 120 kDa | 0 | 10 | 87  | 0 | 0,3  |
| Cleavage and polyadenylation specificity factor subunit 6 OS=Homo sapiens GN=CPSF6 PE=1 SV=2      | Q16630 CPSF6_HUMAN      | 59 kDa  | 0 | 5  | 43  | 0 | 0,3  |
| E3 ubiquitin/ISG15 ligase TRIM25 OS=Homo sapiens GN=TRIM25 PE=1 SV=2                              | Q14258 TRI25_HUMAN      | 71 kDa  | 0 | 6  | 52  | 0 | 0,3  |
| Programmed cell death 6-interacting protein OS=Homo sapiens GN=PDCD6IP PE=1 SV=1                  | Q8WUM4 PDC6I_HUMAN      | 96 kDa  | 0 | 8  | 70  | 0 | 0,3  |
| 28S ribosomal protein S27, mitochondrial OS=Homo sapiens GN=MRPS27 PE=1 SV=3                      | Q92552 RT27_HUMAN       | 48 kDa  | 0 | 4  | 35  | 0 | 0,3  |
| Succinyl-CoA ligase [GDP-forming] subunit beta, mitochondrial OS=Homo sapiens GN=SUCLG2 PE=1 SV=2 | Q96I99 SUCB2_HUMAN      | 47 kDa  | 0 | 4  | 35  | 0 | 0,3  |
| Sorting nexin-6 OS=Homo sapiens GN=SNX6 PE=1 SV=1                                                 | Q9UNH7 SNX6_HUMAN       | 47 kDa  | 0 | 4  | 35  | 0 | 0,3  |
| Elongation factor Ts, mitochondrial OS=Homo sapiens GN=TSFM PE=1 SV=2                             | P43897 EFTS_HUMAN       | 35 kDa  | 0 | 3  | 26  | 0 | 0,3  |
| Ras-related protein R-Ras OS=Homo sapiens GN=RRAS PE=1 SV=1                                       | P10301 RRAS_HUMAN       | 23 kDa  | 0 | 2  | 17  | 0 | 0,3  |
| Coatomer subunit gamma OS=Homo sapiens GN=COPG PE=1 SV=1                                          | Q9Y678 COPG_HUMAN       | 98 kDa  | 0 | 8  | 71  | 0 | 0,29 |
| Golgi to ER traffic protein 4 homolog OS=Homo sapiens GN=GET4 PE=1 SV=1                           | Q7L5D6 GET4_HUMAN       | 37 kDa  | 0 | 3  | 27  | 0 | 0,29 |
| Pre-mRNA-processing-splicing factor 8 OS=Homo sapiens GN=PRPF8 PE=1 SV=2                          | Q6P2Q9 PRP8_HUMAN       | 274 kDa | 0 | 21 | 198 | 0 | 0,28 |
| Regulation of nuclear pre-mRNA domain-containing protein 2 OS=Homo sapiens GN=RPRD2 PE=1 SV=1     | Q5VT52 RPRD2_HUMAN      | 156 kDa | 0 | 12 | 113 | 0 | 0,28 |
| U4/U6.U5 tri-snRNP-associated protein 1 OS=Homo sapiens GN=SART1 PE=1 SV=1                        | O43290 SNUT1_HUMAN      | 90 kDa  | 0 | 7  | 66  | 0 | 0,28 |
| Integrin-linked protein kinase OS=Homo sapiens GN=ILK PE=1 SV=2                                   | Q13418 ILK_HUMAN        | 51 kDa  | 0 | 4  | 38  | 0 | 0,28 |
| Tubulin gamma-1 chain OS=Homo sapiens GN=TUBG1 PE=1 SV=2                                          | P23258 TBG1_HUMAN       | 51 kDa  | 0 | 4  | 38  | 0 | 0,28 |
| Tubulin alpha-1C chain OS=Homo sapiens GN=TUBA1C PE=1 SV=1                                        | Q9BQE3 TBA1C_HUMAN      | 50 kDa  | 0 | 4  | 37  | 0 | 0,28 |
| Eukaryotic translation initiation factor 4E OS=Homo sapiens GN=EIF4E PE=1 SV=2                    | P06730 IF4E_HUMAN       | 25 kDa  | 0 | 2  | 19  | 0 | 0,28 |
| Peptidyl-prolyl cis-trans isomerase FKBP3 OS=Homo sapiens GN=FKBP3 PE=1 SV=1                      | Q00688 FKBP3_HUMAN      | 25 kDa  | 0 | 2  | 19  | 0 | 0,28 |
| Elongation factor 1-beta OS=Homo sapiens GN=EEF1B2 PE=1 SV=3                                      | P24534 EF1B_HUMAN       | 25 kDa  | 0 | 2  | 19  | 0 | 0,28 |
| Adenylate kinase isoenzyme 4, mitochondrial OS=Homo sapiens GN=AK4 PE=1 SV=1                      | P27144 KAD4_HUMAN       | 25 kDa  | 0 | 2  | 19  | 0 | 0,28 |
| Phosphoserine phosphatase OS=Homo sapiens GN=PSPH PE=1 SV=2                                       | P78330 SERB_HUMAN       | 25 kDa  | 0 | 2  | 19  | 0 | 0,28 |

|                                                                                                                  |                         |         |   |    |     |   |      |
|------------------------------------------------------------------------------------------------------------------|-------------------------|---------|---|----|-----|---|------|
| MOB kinase activator 1A OS=Rattus norvegicus GN=Mob1a PE=1 SV=3                                                  | Q3T1J9 MOB1A_RAT (+5)   | 25 kDa  | 0 | 2  | 19  | 0 | 0,28 |
| Charged multivesicular body protein 5 OS=Rattus norvegicus GN=Chmp5 PE=2 SV=1                                    | Q4QQV8 CHMP5_RAT (+3)   | 25 kDa  | 0 | 2  | 19  | 0 | 0,28 |
| UPF0552 protein C15orf38 OS=Homo sapiens GN=C15orf38 PE=1 SV=1                                                   | Q7Z6K5 CO038_HUMAN      | 25 kDa  | 0 | 2  | 19  | 0 | 0,28 |
| 39S ribosomal protein L24, mitochondrial OS=Homo sapiens GN=MRPL24 PE=1 SV=1                                     | Q96A35 RM24_HUMAN       | 25 kDa  | 0 | 2  | 19  | 0 | 0,28 |
| Eukaryotic translation initiation factor 3 subunit K OS=Homo sapiens GN=EIF3K PE=1 SV=1                          | Q9UBQ5 EIF3K_HUMAN      | 25 kDa  | 0 | 2  | 19  | 0 | 0,28 |
| Mammalian ependymin-related protein 1 OS=Homo sapiens GN=EPDR1 PE=1 SV=2                                         | Q9UM22 EPDR1_HUMAN      | 25 kDa  | 0 | 2  | 19  | 0 | 0,28 |
| Glutathione S-transferase kappa 1 OS=Homo sapiens GN=GSTK1 PE=1 SV=3                                             | Q9Y2Q3 GSTK1_HUMAN      | 25 kDa  | 0 | 2  | 19  | 0 | 0,28 |
| Bifunctional glutamate/proline--tRNA ligase OS=Homo sapiens GN=EPRS PE=1 SV=5                                    | P07814 SYEP_HUMAN       | 171 kDa | 0 | 13 | 124 | 0 | 0,27 |
| Vacuolar protein sorting-associated protein 35 OS=Homo sapiens GN=VPS35 PE=1 SV=2                                | Q96QK1 VPS35_HUMAN      | 92 kDa  | 0 | 7  | 67  | 0 | 0,27 |
| Structural maintenance of chromosomes protein 4 OS=Homo sapiens GN=SMC4 PE=1 SV=2                                | Q9NTJ3 SMC4_HUMAN       | 147 kDa | 0 | 11 | 107 | 0 | 0,27 |
| HEAT repeat-containing protein 2 OS=Homo sapiens GN=HEATR2 PE=1 SV=4                                             | Q86Y56 HEAT2_HUMAN      | 94 kDa  | 0 | 7  | 68  | 0 | 0,27 |
| Uridine 5'-monophosphate synthase OS=Homo sapiens GN=UMPS PE=1 SV=1                                              | P11172 UMPS_HUMAN       | 52 kDa  | 0 | 4  | 38  | 0 | 0,27 |
| RNA-binding protein FUS OS=Homo sapiens GN=FUS PE=1 SV=1                                                         | P35637 FUS_HUMAN        | 53 kDa  | 0 | 4  | 39  | 0 | 0,27 |
| Cleavage and polyadenylation specificity factor subunit 7 OS=Homo sapiens GN=CPSF7 PE=1 SV=1                     | Q8N684 CPSF7_HUMAN      | 52 kDa  | 0 | 4  | 38  | 0 | 0,27 |
| Sorting nexin-8 OS=Homo sapiens GN=SNX8 PE=1 SV=1                                                                | Q9Y5X2 SNX8_HUMAN       | 53 kDa  | 0 | 4  | 39  | 0 | 0,27 |
| Replication factor C subunit 2 OS=Homo sapiens GN=RFC2 PE=1 SV=3                                                 | P35250 RFC2_HUMAN       | 39 kDa  | 0 | 3  | 29  | 0 | 0,27 |
| N-alpha-acetyltransferase 10 OS=Homo sapiens GN=NAA10 PE=1 SV=1                                                  | P41227 NAA10_HUMAN      | 26 kDa  | 0 | 2  | 20  | 0 | 0,27 |
| Ubiquitin carboxyl-terminal hydrolase isozyme L3 OS=Homo sapiens GN=UCHL3 PE=1 SV=1                              | P15374 UCHL3_HUMAN (+2) | 26 kDa  | 0 | 2  | 20  | 0 | 0,27 |
| Adenylate kinase 2, mitochondrial OS=Homo sapiens GN=AK2 PE=1 SV=2                                               | P54819 KAD2_HUMAN       | 26 kDa  | 0 | 2  | 20  | 0 | 0,27 |
| Calnexin OS=Homo sapiens GN=CANX PE=1 SV=2                                                                       | P27824 CALX_HUMAN       | 68 kDa  | 0 | 5  | 50  | 0 | 0,26 |
| Double-strand break repair protein MRE11A OS=Homo sapiens GN=MRE11A PE=1 SV=3                                    | P49959 MRE11_HUMAN      | 81 kDa  | 0 | 6  | 59  | 0 | 0,26 |
| Protein LTV1 homolog OS=Homo sapiens GN=LTV1 PE=1 SV=1                                                           | Q96GA3 LTV1_HUMAN       | 55 kDa  | 0 | 4  | 40  | 0 | 0,26 |
| Solute carrier family 2, facilitated glucose transporter member 1 OS=Homo sapiens GN=SLC2A1 PE=1 SV=2            | P11166 GTR1_HUMAN       | 54 kDa  | 0 | 4  | 40  | 0 | 0,26 |
| Twinfilin-2 OS=Homo sapiens GN=TWf2 PE=1 SV=2                                                                    | Q6IBS0 TWf2_HUMAN       | 40 kDa  | 0 | 3  | 30  | 0 | 0,26 |
| Adenylosuccinate lyase OS=Homo sapiens GN=ADSL PE=1 SV=2                                                         | P30566 PUR8_HUMAN (+1)  | 55 kDa  | 0 | 4  | 40  | 0 | 0,26 |
| Mannose-P-dolichol utilization defect 1 protein OS=Homo sapiens GN=MPDU1 PE=1 SV=2                               | O75352 MPU1_HUMAN       | 27 kDa  | 0 | 2  | 20  | 0 | 0,26 |
| Dolichyldiphosphatase 1 OS=Homo sapiens GN=DOLPP1 PE=1 SV=1                                                      | Q86YN1 DOPP1_HUMAN      | 27 kDa  | 0 | 2  | 20  | 0 | 0,26 |
| MMS19 nucleotide excision repair protein homolog OS=Homo sapiens GN=MMS19 PE=1 SV=2                              | Q96T76 MMS19_HUMAN      | 113 kDa | 0 | 8  | 82  | 0 | 0,25 |
| Sarcoplasmic/endoplasmic reticulum calcium ATPase 2 OS=Homo sapiens GN=ATP2A2 PE=1 SV=1                          | P16615 AT2A2_HUMAN      | 115 kDa | 0 | 8  | 84  | 0 | 0,25 |
| tRNA (cytosine(34)-C(5))-methyltransferase OS=Homo sapiens GN=NSUN2 PE=1 SV=2                                    | Q08J23 NSUN2_HUMAN      | 86 kDa  | 0 | 6  | 63  | 0 | 0,25 |
| Protein arginine N-methyltransferase 1 OS=Homo sapiens GN=PRMT1 PE=1 SV=2                                        | Q99873 ANM1_HUMAN       | 42 kDa  | 0 | 3  | 31  | 0 | 0,25 |
| Cysteine--tRNA ligase, cytoplasmic OS=Homo sapiens GN=CARS PE=1 SV=3                                             | P49589 SYCC_HUMAN       | 85 kDa  | 0 | 6  | 62  | 0 | 0,25 |
| Calpain small subunit 1 OS=Homo sapiens GN=CAPNS1 PE=1 SV=1                                                      | P04632 CPNS1_HUMAN      | 28 kDa  | 0 | 2  | 21  | 0 | 0,25 |
| RNA-binding protein PNO1 OS=Homo sapiens GN=PNO1 PE=1 SV=1                                                       | Q9NRX1 PNO1_HUMAN       | 28 kDa  | 0 | 2  | 21  | 0 | 0,25 |
| mRNA turnover protein 4 homolog OS=Homo sapiens GN=MRTO4 PE=1 SV=2                                               | Q9UKD2 MRT4_HUMAN       | 28 kDa  | 0 | 2  | 21  | 0 | 0,25 |
| UPF0568 protein C14orf166 OS=Homo sapiens GN=C14orf166 PE=1 SV=1                                                 | Q9Y224 CN166_HUMAN      | 28 kDa  | 0 | 2  | 21  | 0 | 0,25 |
| Importin-9 OS=Homo sapiens GN=IPO9 PE=1 SV=3                                                                     | Q96P70 IPO9_HUMAN       | 116 kDa | 0 | 8  | 84  | 0 | 0,24 |
| Leucine--tRNA ligase, cytoplasmic OS=Homo sapiens GN=LARS PE=1 SV=2                                              | Q9P2J5 SYLC_HUMAN       | 134 kDa | 0 | 9  | 97  | 0 | 0,24 |
| Transportin-1 OS=Homo sapiens GN=TNPO1 PE=1 SV=2                                                                 | Q92973 TNPO1_HUMAN      | 102 kDa | 0 | 7  | 74  | 0 | 0,24 |
| WD repeat-containing protein 36 OS=Homo sapiens GN=WDR36 PE=1 SV=1                                               | Q8NI36 WDR36_HUMAN      | 105 kDa | 0 | 7  | 76  | 0 | 0,24 |
| BRCA1-associated ATM activator 1 OS=Homo sapiens GN=BRAT1 PE=1 SV=2                                              | Q6PJG6 BRAT1_HUMAN      | 88 kDa  | 0 | 6  | 64  | 0 | 0,24 |
| Far upstream element-binding protein 2 OS=Homo sapiens GN=KHSRP PE=1 SV=4                                        | Q92945 FUBP2_HUMAN      | 73 kDa  | 0 | 5  | 53  | 0 | 0,24 |
| DNA primase large subunit OS=Homo sapiens GN=PRIM2 PE=1 SV=2                                                     | P49643 PRI2_HUMAN       | 59 kDa  | 0 | 4  | 43  | 0 | 0,24 |
| Paraspeckle component 1 OS=Homo sapiens GN=PSPC1 PE=1 SV=1                                                       | Q8WXF1 PSPC1_HUMAN      | 59 kDa  | 0 | 4  | 43  | 0 | 0,24 |
| Emerin OS=Homo sapiens GN=EMD PE=1 SV=1                                                                          | P50402 EMD_HUMAN        | 29 kDa  | 0 | 2  | 22  | 0 | 0,24 |
| 60S ribosomal protein L7-like 1 OS=Homo sapiens GN=RPL7L1 PE=1 SV=1                                              | Q6DKI1 RL7L_HUMAN       | 29 kDa  | 0 | 2  | 22  | 0 | 0,24 |
| Enolase-phosphatase E1 OS=Homo sapiens GN=ENOPH1 PE=1 SV=1                                                       | Q9UHY7 ENOPH_HUMAN      | 29 kDa  | 0 | 2  | 22  | 0 | 0,24 |
| Nuclear pore complex protein Nup93 OS=Homo sapiens GN=NUP93 PE=1 SV=2                                            | Q8N1F7 NUP93_HUMAN      | 93 kDa  | 0 | 6  | 68  | 0 | 0,23 |
| Alanine--tRNA ligase, cytoplasmic OS=Homo sapiens GN=AARS PE=1 SV=2                                              | P49588 SYAC_HUMAN       | 107 kDa | 0 | 7  | 78  | 0 | 0,23 |
| Nucleosome assembly protein 1-like 1 OS=Homo sapiens GN=NAP1L1 PE=1 SV=1                                         | P55209 NP1L1_HUMAN      | 45 kDa  | 0 | 3  | 33  | 0 | 0,23 |
| cAMP-dependent protein kinase type II-alpha regulatory subunit OS=Homo sapiens GN=PRKAR2A PE=1 SV=2              | P13861 KAP2_HUMAN       | 46 kDa  | 0 | 3  | 34  | 0 | 0,23 |
| 39S ribosomal protein L38, mitochondrial OS=Homo sapiens GN=MRPL38 PE=1 SV=2                                     | Q96DV4 RM38_HUMAN       | 45 kDa  | 0 | 3  | 33  | 0 | 0,23 |
| Hydroxysteroid dehydrogenase-like protein 2 OS=Homo sapiens GN=HSDL2 PE=1 SV=1                                   | Q6YN16 HSDL2_HUMAN      | 45 kDa  | 0 | 3  | 33  | 0 | 0,23 |
| Mannose-1-phosphate guanyltransferase alpha OS=Homo sapiens GN=GMPPA PE=1 SV=1                                   | Q96IJ6 GMPPA_HUMAN      | 46 kDa  | 0 | 3  | 34  | 0 | 0,23 |
| DCN1-like protein 1 OS=Homo sapiens GN=DCUN1D1 PE=1 SV=1                                                         | Q96GG9 DCNL1_HUMAN      | 30 kDa  | 0 | 2  | 22  | 0 | 0,23 |
| Dolichol-phosphate mannosyltransferase OS=Homo sapiens GN=DPM1 PE=1 SV=1                                         | O60762 DPM1_HUMAN       | 30 kDa  | 0 | 2  | 22  | 0 | 0,23 |
| DnaJ homolog subfamily C member 9 OS=Homo sapiens GN=DNAJC9 PE=1 SV=1                                            | Q8WXX5 DNJC9_HUMAN      | 30 kDa  | 0 | 2  | 22  | 0 | 0,23 |
| KH domain-containing, RNA-binding, signal transduction-associated protein 1 OS=Homo sapiens GN=KHDRBS1 PE=1 SV=1 | Q07666 KHDR1_HUMAN      | 48 kDa  | 0 | 3  | 35  | 0 | 0,22 |
| Glutamate--cysteine ligase regulatory subunit OS=Homo sapiens GN=GCLM PE=1 SV=1                                  | P48507 GSHO_HUMAN       | 31 kDa  | 0 | 2  | 23  | 0 | 0,22 |



|                                                                                                                                  |                         |         |   |    |     |   |      |
|----------------------------------------------------------------------------------------------------------------------------------|-------------------------|---------|---|----|-----|---|------|
| Acetyl-CoA carboxylase 1 OS=Homo sapiens GN=ACACA PE=1 SV=2                                                                      | Q13085 ACACA_HUMAN      | 266 kDa | 0 | 16 | 192 | 0 | 0,21 |
| Exportin-5 OS=Homo sapiens GN=XPO5 PE=1 SV=1                                                                                     | Q9HAV4 XPO5_HUMAN       | 136 kDa | 0 | 8  | 99  | 0 | 0,21 |
| Splicing factor 3B subunit 2 OS=Homo sapiens GN=SF3B2 PE=1 SV=2                                                                  | Q13435 SF3B2_HUMAN      | 100 kDa | 0 | 6  | 73  | 0 | 0,21 |
| Tubulin beta-4 chain OS=Homo sapiens GN=TUBB4 PE=1 SV=2                                                                          | P04350 TBB4_HUMAN       | 50 kDa  | 0 | 3  | 37  | 0 | 0,21 |
| Nucleophosmin OS=Homo sapiens GN=NPM1 PE=1 SV=2                                                                                  | P06748 NPM_HUMAN        | 33 kDa  | 0 | 2  | 25  | 0 | 0,21 |
| Serine/threonine-protein phosphatase 2A 65 kDa regulatory subunit A alpha isoform OS=Homo sapiens GN=PPP2R1P30153 2AAA_HUMAN     | P30153 2AAA_HUMAN       | 65 kDa  | 0 | 4  | 48  | 0 | 0,21 |
| Procollagen-lysine,2-oxoglutarate 5-dioxygenase 1 OS=Homo sapiens GN=PLOD1 PE=1 SV=2                                             | Q02809 PLOD1_HUMAN      | 84 kDa  | 0 | 5  | 61  | 0 | 0,21 |
| Mitochondrial carrier homolog 2 OS=Homo sapiens GN=MTCH2 PE=1 SV=1                                                               | Q9Y6C9 MTCH2_HUMAN      | 33 kDa  | 0 | 2  | 25  | 0 | 0,21 |
| Nitric oxide synthase-interacting protein OS=Homo sapiens GN=NOSIP PE=1 SV=1                                                     | Q9Y314 NOSIP_HUMAN      | 33 kDa  | 0 | 2  | 25  | 0 | 0,21 |
| Serine/threonine-protein phosphatase PGAM5, mitochondrial OS=Homo sapiens GN=PGAM5 PE=1 SV=2                                     | Q96HS1 PGAM5_HUMAN      | 32 kDa  | 0 | 2  | 24  | 0 | 0,21 |
| Cyclin-dependent kinase 5 OS=Homo sapiens GN=CDK5 PE=1 SV=3                                                                      | Q00535 CDK5_HUMAN       | 33 kDa  | 0 | 2  | 25  | 0 | 0,21 |
| 39S ribosomal protein L46, mitochondrial OS=Homo sapiens GN=MRPL46 PE=1 SV=1                                                     | Q9H2W6 RM46_HUMAN       | 32 kDa  | 0 | 2  | 24  | 0 | 0,21 |
| RNA-binding protein Raly OS=Homo sapiens GN=RALY PE=1 SV=1                                                                       | Q9UKM9 RALY_HUMAN       | 32 kDa  | 0 | 2  | 24  | 0 | 0,21 |
| Translational activator GCN1 OS=Homo sapiens GN=GCN1L1 PE=1 SV=6                                                                 | Q92616 GCN1L_HUMAN      | 293 kDa | 0 | 17 | 212 | 0 | 0,2  |
| Protein scribble homolog OS=Homo sapiens GN=SCRIB PE=1 SV=4                                                                      | Q14160 SCRIB_HUMAN      | 175 kDa | 0 | 10 | 127 | 0 | 0,2  |
| Far upstream element-binding protein 1 OS=Homo sapiens GN=FUBP1 PE=1 SV=3                                                        | Q96AE4 FUBP1_HUMAN      | 68 kDa  | 0 | 4  | 50  | 0 | 0,2  |
| Nuclear autoantigenic sperm protein OS=Homo sapiens GN=NASP PE=1 SV=2                                                            | P49321 NASP_HUMAN       | 85 kDa  | 0 | 5  | 62  | 0 | 0,2  |
| Guanine nucleotide-binding protein-like 1 OS=Homo sapiens GN=GNL1 PE=1 SV=2                                                      | P36915 GNL1_HUMAN       | 69 kDa  | 0 | 4  | 50  | 0 | 0,2  |
| Isocitrate dehydrogenase [NADP], mitochondrial OS=Homo sapiens GN=IDH2 PE=1 SV=2                                                 | P48735 IDHP_HUMAN       | 51 kDa  | 0 | 3  | 38  | 0 | 0,2  |
| Ethylmalonyl-CoA decarboxylase OS=Homo sapiens GN=ECHDC1 PE=1 SV=2                                                               | Q9NTX5 ECHD1_HUMAN      | 34 kDa  | 0 | 2  | 25  | 0 | 0,2  |
| Protein NipSnap homolog 2 OS=Homo sapiens GN=GBAS PE=1 SV=1                                                                      | O75323 NIPS2_HUMAN      | 34 kDa  | 0 | 2  | 25  | 0 | 0,2  |
| Crk-like protein OS=Homo sapiens GN=CRKL PE=1 SV=1                                                                               | P46109 CRKL_HUMAN       | 34 kDa  | 0 | 2  | 25  | 0 | 0,2  |
| Spermidine synthase OS=Homo sapiens GN=SRM PE=1 SV=1                                                                             | P19623 SPEE_HUMAN (+1)  | 34 kDa  | 0 | 2  | 25  | 0 | 0,2  |
| Palmitoyl-protein thioesterase 1 OS=Homo sapiens GN=PPT1 PE=1 SV=1                                                               | P50897 PPT1_HUMAN       | 34 kDa  | 0 | 2  | 25  | 0 | 0,2  |
| Hydroxyacyl-coenzyme A dehydrogenase, mitochondrial OS=Homo sapiens GN=HADH PE=1 SV=3                                            | Q16836 HCDH_HUMAN       | 34 kDa  | 0 | 2  | 25  | 0 | 0,2  |
| Estradiol 17-beta-dehydrogenase 12 OS=Homo sapiens GN=HSD17B12 PE=1 SV=2                                                         | Q53GQ0 DHB12_HUMAN      | 34 kDa  | 0 | 2  | 25  | 0 | 0,2  |
| Mitochondrial glutamate carrier 1 OS=Homo sapiens GN=SLC25A22 PE=1 SV=1                                                          | Q9H936 GHC1_HUMAN (+1)  | 34 kDa  | 0 | 2  | 25  | 0 | 0,2  |
| Zinc finger protein 318 OS=Homo sapiens GN=ZNF318 PE=1 SV=2                                                                      | Q5VUA4 ZN318_HUMAN      | 251 kDa | 0 | 14 | 182 | 0 | 0,19 |
| Coatomer subunit beta OS=Homo sapiens GN=COPB1 PE=1 SV=3                                                                         | P53618 COPB_HUMAN       | 107 kDa | 0 | 6  | 78  | 0 | 0,19 |
| Nck-associated protein 1 OS=Homo sapiens GN=NCKAP1 PE=1 SV=1                                                                     | Q9Y2A7 NCKP1_HUMAN      | 129 kDa | 0 | 7  | 94  | 0 | 0,19 |
| General vesicular transport factor p115 OS=Homo sapiens GN=USO1 PE=1 SV=2                                                        | O60763 USO1_HUMAN       | 108 kDa | 0 | 6  | 79  | 0 | 0,19 |
| Splicing factor 3A subunit 1 OS=Bos taurus GN=SF3A1 PE=2 SV=1                                                                    | A2VDN6 SF3A1_BOVIN (+1) | 89 kDa  | 0 | 5  | 65  | 0 | 0,19 |
| Histone deacetylase 2 OS=Homo sapiens GN=HDAC2 PE=1 SV=2                                                                         | Q92769 HDAC2_HUMAN      | 55 kDa  | 0 | 3  | 40  | 0 | 0,19 |
| 26S proteasome non-ATPase regulatory subunit 12 OS=Homo sapiens GN=PSMD12 PE=1 SV=3                                              | O00232 PSD12_HUMAN      | 53 kDa  | 0 | 3  | 39  | 0 | 0,19 |
| Nucleolar GTP-binding protein 1 OS=Homo sapiens GN=GTPBP4 PE=1 SV=3                                                              | Q9BZE4 NOG1_HUMAN       | 74 kDa  | 0 | 4  | 54  | 0 | 0,19 |
| Fumarate hydratase, mitochondrial OS=Homo sapiens GN=FH PE=1 SV=3                                                                | P07954 FUMH_HUMAN       | 55 kDa  | 0 | 3  | 40  | 0 | 0,19 |
| U4/U6 small nuclear ribonucleoprotein Prp31 OS=Homo sapiens GN=PRPF31 PE=1 SV=2                                                  | Q8WWY3 PRP31_HUMAN      | 55 kDa  | 0 | 3  | 40  | 0 | 0,19 |
| FAS-associated factor 2 OS=Homo sapiens GN=FAF2 PE=1 SV=2                                                                        | Q96CS3 FAF2_HUMAN       | 53 kDa  | 0 | 3  | 39  | 0 | 0,19 |
| Lysophospholipid acyltransferase 7 OS=Homo sapiens GN=MBOAT7 PE=1 SV=2                                                           | Q96N66 MBOA7_HUMAN      | 53 kDa  | 0 | 3  | 39  | 0 | 0,19 |
| CDK-activating kinase assembly factor MAT1 OS=Homo sapiens GN=MNAT1 PE=1 SV=1                                                    | P51948 MAT1_HUMAN       | 36 kDa  | 0 | 2  | 27  | 0 | 0,19 |
| Lymphokine-activated killer T-cell-originated protein kinase OS=Homo sapiens GN=PBK PE=1 SV=3                                    | Q96KB5 TOPK_HUMAN       | 36 kDa  | 0 | 2  | 27  | 0 | 0,19 |
| Protein MAK16 homolog OS=Homo sapiens GN=MAK16 PE=1 SV=2                                                                         | Q9BXY0 MAK16_HUMAN      | 35 kDa  | 0 | 2  | 26  | 0 | 0,19 |
| BRCA2 and CDKN1A-interacting protein OS=Homo sapiens GN=BCCIP PE=1 SV=1                                                          | Q9P287 BCCIP_HUMAN      | 36 kDa  | 0 | 2  | 27  | 0 | 0,19 |
| Nuclear receptor corepressor 2 OS=Homo sapiens GN=NCOR2 PE=1 SV=2                                                                | Q9Y618 NCOR2_HUMAN      | 275 kDa | 0 | 14 | 199 | 0 | 0,18 |
| Importin subunit alpha-3 OS=Homo sapiens GN=KPNA3 PE=1 SV=2                                                                      | O00505 IMA3_HUMAN       | 58 kDa  | 0 | 3  | 43  | 0 | 0,18 |
| V-type proton ATPase subunit H OS=Homo sapiens GN=ATP6V1H PE=1 SV=1                                                              | Q9UI12 VATH_HUMAN       | 56 kDa  | 0 | 3  | 41  | 0 | 0,18 |
| Serine-threonine kinase receptor-associated protein OS=Homo sapiens GN=STRAP PE=1 SV=1                                           | Q9Y3F4 STRAP_HUMAN      | 38 kDa  | 0 | 2  | 28  | 0 | 0,18 |
| SUMO-activating enzyme subunit 1 OS=Homo sapiens GN=SAE1 PE=1 SV=1                                                               | Q9UBE0 SAE1_HUMAN       | 38 kDa  | 0 | 2  | 28  | 0 | 0,18 |
| Glutaredoxin-3 OS=Homo sapiens GN=GLRX3 PE=1 SV=2                                                                                | O76003 GLRX3_HUMAN      | 37 kDa  | 0 | 2  | 27  | 0 | 0,18 |
| Replication factor C subunit 5 OS=Homo sapiens GN=RFC5 PE=1 SV=1                                                                 | P40937 RFC5_HUMAN       | 38 kDa  | 0 | 2  | 28  | 0 | 0,18 |
| D-beta-hydroxybutyrate dehydrogenase, mitochondrial OS=Homo sapiens GN=BDH1 PE=1 SV=3                                            | Q02338 BDH_HUMAN        | 38 kDa  | 0 | 2  | 28  | 0 | 0,18 |
| SWI/SNF-related matrix-associated actin-dependent regulator of chromatin subfamily A member 5 OS=Homo sapiens GN=SMCA5 PE=1 SV=1 | O60264 SMCA5_HUMAN      | 122 kDa | 0 | 6  | 89  | 0 | 0,17 |
| Importin subunit alpha-7 OS=Homo sapiens GN=KPNA6 PE=1 SV=1                                                                      | O60684 IMA7_HUMAN (+1)  | 60 kDa  | 0 | 3  | 44  | 0 | 0,17 |
| 39S ribosomal protein L39, mitochondrial OS=Homo sapiens GN=MRPL39 PE=1 SV=3                                                     | Q9NYK5 RM39_HUMAN       | 39 kDa  | 0 | 2  | 29  | 0 | 0,17 |
| Tubulin-specific chaperone E OS=Homo sapiens GN=TBCE PE=1 SV=1                                                                   | Q15813 TBCE_HUMAN       | 59 kDa  | 0 | 3  | 43  | 0 | 0,17 |
| 39S ribosomal protein L3, mitochondrial OS=Homo sapiens GN=MRPL3 PE=1 SV=1                                                       | P09001 RM03_HUMAN       | 39 kDa  | 0 | 2  | 29  | 0 | 0,17 |
| Serine/arginine-rich splicing factor 6 OS=Homo sapiens GN=SRSF6 PE=1 SV=2                                                        | Q13247 SRSF6_HUMAN      | 40 kDa  | 0 | 2  | 30  | 0 | 0,17 |
| UPF0609 protein C4orf27 OS=Homo sapiens GN=C4orf27 PE=1 SV=2                                                                     | Q9NWWY4 CD027_HUMAN     | 39 kDa  | 0 | 2  | 29  | 0 | 0,17 |
| Replication factor C subunit 4 OS=Homo sapiens GN=RFC4 PE=1 SV=2                                                                 | P35249 RFC4_HUMAN       | 40 kDa  | 0 | 2  | 30  | 0 | 0,17 |

|                                                                                                                                 |                         |         |   |    |     |   |      |
|---------------------------------------------------------------------------------------------------------------------------------|-------------------------|---------|---|----|-----|---|------|
| Poly(ADP-ribose) glycohydrolase ARH3 OS=Homo sapiens GN=ADPRHL2 PE=1 SV=1                                                       | Q9NX46 ARHL2_HUMAN      | 39 kDa  | 0 | 2  | 29  | 0 | 0,17 |
| Nuclear pore complex protein Nup107 OS=Homo sapiens GN=NUP107 PE=1 SV=1                                                         | P57740 NU107_HUMAN      | 106 kDa | 0 | 5  | 77  | 0 | 0,16 |
| Vesicle-fusing ATPase OS=Homo sapiens GN=NSF PE=1 SV=3                                                                          | P46459 NSF_HUMAN        | 83 kDa  | 0 | 4  | 61  | 0 | 0,16 |
| Protein transport protein Sec23A OS=Homo sapiens GN=SEC23A PE=1 SV=2                                                            | Q15436 SC23A_HUMAN      | 86 kDa  | 0 | 4  | 63  | 0 | 0,16 |
| Minor histocompatibility antigen H13 OS=Homo sapiens GN=HM13 PE=1 SV=1                                                          | Q8TCT9 HM13_HUMAN       | 41 kDa  | 0 | 2  | 30  | 0 | 0,16 |
| Alpha-parvin OS=Homo sapiens GN=PARVA PE=1 SV=1                                                                                 | Q9NVD7 PARVA_HUMAN      | 42 kDa  | 0 | 2  | 31  | 0 | 0,16 |
| RNA 3'-terminal phosphate cyclase-like protein OS=Homo sapiens GN=RCL1 PE=1 SV=3                                                | Q9Y2P8 RCL1_HUMAN       | 41 kDa  | 0 | 2  | 30  | 0 | 0,16 |
| NADH dehydrogenase [ubiquinone] 1 alpha subcomplex subunit 9, mitochondrial OS=Homo sapiens GN=NDUFA9 PE=1 SV=1                 | Q16795 NDUA9_HUMAN (+1) | 43 kDa  | 0 | 2  | 32  | 0 | 0,16 |
| E3 ubiquitin-protein ligase KCMF1 OS=Homo sapiens GN=KCMF1 PE=1 SV=2                                                            | Q9P0J7 KCMF1_HUMAN      | 42 kDa  | 0 | 2  | 31  | 0 | 0,16 |
| Integrin-linked kinase-associated serine/threonine phosphatase 2C OS=Bos taurus GN=ILKAP PE=2 SV=1                              | Q0IIF0 ILKAP_BOVIN (+3) | 41 kDa  | 0 | 2  | 30  | 0 | 0,16 |
| NudC domain-containing protein 3 OS=Homo sapiens GN=NUDCD3 PE=1 SV=3                                                            | Q8IVD9 NUDC3_HUMAN      | 41 kDa  | 0 | 2  | 30  | 0 | 0,16 |
| Muscleblind-like protein 1 OS=Homo sapiens GN=MBNL1 PE=1 SV=2                                                                   | Q9NR56 MBNL1_HUMAN      | 42 kDa  | 0 | 2  | 31  | 0 | 0,16 |
| Myosin-10 OS=Homo sapiens GN=MYH10 PE=1 SV=3                                                                                    | P35580 MYH10_HUMAN      | 229 kDa | 0 | 10 | 166 | 0 | 0,15 |
| Exportin-T OS=Homo sapiens GN=XPOT PE=1 SV=2                                                                                    | O43592 XPOT_HUMAN       | 110 kDa | 0 | 5  | 80  | 0 | 0,15 |
| Sodium/potassium-transporting ATPase subunit alpha-1 OS=Homo sapiens GN=ATP1A1 PE=1 SV=1                                        | P05023 AT1A1_HUMAN      | 113 kDa | 0 | 5  | 82  | 0 | 0,15 |
| Nuclear cap-binding protein subunit 1 OS=Homo sapiens GN=NCBP1 PE=1 SV=1                                                        | Q09161 NCBP1_HUMAN      | 92 kDa  | 0 | 4  | 67  | 0 | 0,15 |
| Band 4.1-like protein 2 OS=Homo sapiens GN=EPB41L2 PE=1 SV=1                                                                    | O43491 E41L2_HUMAN      | 113 kDa | 0 | 5  | 82  | 0 | 0,15 |
| TOX high mobility group box family member 4 OS=Homo sapiens GN=TOX4 PE=1 SV=1                                                   | O94842 TOX4_HUMAN (+1)  | 66 kDa  | 0 | 3  | 48  | 0 | 0,15 |
| 28S ribosomal protein S29, mitochondrial OS=Homo sapiens GN=DAP3 PE=1 SV=1                                                      | P51398 RT29_HUMAN       | 46 kDa  | 0 | 2  | 34  | 0 | 0,15 |
| ATP-binding cassette sub-family E member 1 OS=Homo sapiens GN=ABCE1 PE=1 SV=1                                                   | P61221 ABCE1_HUMAN      | 67 kDa  | 0 | 3  | 49  | 0 | 0,15 |
| V-type proton ATPase catalytic subunit A OS=Homo sapiens GN=ATP6V1A PE=1 SV=2                                                   | P38606 VATA_HUMAN       | 68 kDa  | 0 | 3  | 50  | 0 | 0,15 |
| Pre-mRNA 3'-end-processing factor FIP1 OS=Homo sapiens GN=FIP1L1 PE=1 SV=1                                                      | Q6UN15 FIP1_HUMAN       | 67 kDa  | 0 | 3  | 49  | 0 | 0,15 |
| Putative adenosylhomocysteinase 3 OS=Homo sapiens GN=AHCYL2 PE=1 SV=1                                                           | Q96HN2 SAHH3_HUMAN (+1) | 67 kDa  | 0 | 3  | 49  | 0 | 0,15 |
| SWI/SNF-related matrix-associated actin-dependent regulator of chromatin subfamily B member 1 OS=Homo sapiens GN=BRG1 PE=1 SV=1 | Q12824 SNF5_HUMAN       | 44 kDa  | 0 | 2  | 32  | 0 | 0,15 |
| Alanyl-tRNA editing protein Aarsd1 OS=Homo sapiens GN=AARSD1 PE=1 SV=2                                                          | Q9BTE6 AASD1_HUMAN      | 45 kDa  | 0 | 2  | 33  | 0 | 0,15 |
| Cat eye syndrome critical region protein 5 OS=Homo sapiens GN=CECR5 PE=1 SV=1                                                   | Q9BXW7 CECR5_HUMAN      | 46 kDa  | 0 | 2  | 34  | 0 | 0,15 |
| Probable DNA dC->dU-editing enzyme APOBEC-3B OS=Homo sapiens GN=APOBEC3B PE=1 SV=1                                              | Q9UH17 ABC3B_HUMAN      | 46 kDa  | 0 | 2  | 34  | 0 | 0,15 |
| Filamin-C OS=Homo sapiens GN=FLNC PE=1 SV=3                                                                                     | Q14315 FLNC_HUMAN       | 291 kDa | 0 | 12 | 210 | 0 | 0,14 |
| Vigilin OS=Homo sapiens GN=HDLBP PE=1 SV=2                                                                                      | Q00341 VIGLN_HUMAN      | 141 kDa | 0 | 6  | 102 | 0 | 0,14 |
| Structural maintenance of chromosomes protein 3 OS=Homo sapiens GN=SMC3 PE=1 SV=2                                               | Q9UQE7 SMC3_HUMAN       | 142 kDa | 0 | 6  | 103 | 0 | 0,14 |
| Exportin-7 OS=Homo sapiens GN=XPO7 PE=1 SV=3                                                                                    | Q9UIA9 XPO7_HUMAN       | 124 kDa | 0 | 5  | 90  | 0 | 0,14 |
| Proline-, glutamic acid- and leucine-rich protein 1 OS=Homo sapiens GN=PELP1 PE=1 SV=2                                          | Q8IZL8 PELP1_HUMAN      | 120 kDa | 0 | 5  | 87  | 0 | 0,14 |
| Microtubule-associated protein 4 OS=Homo sapiens GN=MAP4 PE=1 SV=3                                                              | P27816 MAP4_HUMAN       | 121 kDa | 0 | 5  | 88  | 0 | 0,14 |
| ATPase family AAA domain-containing protein 3A OS=Homo sapiens GN=ATAD3A PE=1 SV=2                                              | Q9NVI7 ATD3A_HUMAN      | 71 kDa  | 0 | 3  | 52  | 0 | 0,14 |
| Mitochondrial ribonuclease P protein 1 OS=Homo sapiens GN=RG9MTD1 PE=1 SV=2                                                     | Q7L0Y3 MRRP1_HUMAN      | 47 kDa  | 0 | 2  | 35  | 0 | 0,14 |
| Bromodomain-containing protein 7 OS=Homo sapiens GN=BRD7 PE=1 SV=1                                                              | Q9NPI1 BRD7_HUMAN       | 74 kDa  | 0 | 3  | 54  | 0 | 0,14 |
| Mitogen-activated protein kinase 8 OS=Homo sapiens GN=MAPK8 PE=1 SV=2                                                           | P45983 MK08_HUMAN       | 48 kDa  | 0 | 2  | 35  | 0 | 0,14 |
| SRSF protein kinase 1 OS=Homo sapiens GN=SRPK1 PE=1 SV=2                                                                        | Q96SB4 SRPK1_HUMAN      | 74 kDa  | 0 | 3  | 54  | 0 | 0,14 |
| 2',3'-cyclic-nucleotide 3'-phosphodiesterase OS=Homo sapiens GN=CNP PE=1 SV=2                                                   | P09543 CN37_HUMAN       | 48 kDa  | 0 | 2  | 35  | 0 | 0,14 |
| Serine/threonine-protein kinase 25 OS=Homo sapiens GN=STK25 PE=1 SV=1                                                           | O00506 STK25_HUMAN      | 48 kDa  | 0 | 2  | 35  | 0 | 0,14 |
| Lupus La protein OS=Homo sapiens GN=SSB PE=1 SV=2                                                                               | P05455 LA_HUMAN         | 47 kDa  | 0 | 2  | 35  | 0 | 0,14 |
| Eukaryotic peptide chain release factor subunit 1 OS=Homo sapiens GN=ETF1 PE=1 SV=3                                             | P62495 ERF1_HUMAN       | 49 kDa  | 0 | 2  | 36  | 0 | 0,14 |
| 28S ribosomal protein S5, mitochondrial OS=Homo sapiens GN=MRPS5 PE=1 SV=2                                                      | P82675 RT05_HUMAN       | 48 kDa  | 0 | 2  | 35  | 0 | 0,14 |
| Endoplasmic reticulum resident protein 44 OS=Homo sapiens GN=ERP44 PE=1 SV=1                                                    | Q9BS26 ERP44_HUMAN      | 47 kDa  | 0 | 2  | 35  | 0 | 0,14 |
| 39S ribosomal protein L37, mitochondrial OS=Homo sapiens GN=MRPL37 PE=1 SV=2                                                    | Q9BZE1 RM37_HUMAN       | 48 kDa  | 0 | 2  | 35  | 0 | 0,14 |
| Drebrin-like protein OS=Homo sapiens GN=DBNL PE=1 SV=1                                                                          | Q9UJU6 DBNL_HUMAN       | 48 kDa  | 0 | 2  | 35  | 0 | 0,14 |
| Ubiquitin carboxyl-terminal hydrolase 7 OS=Homo sapiens GN=USP7 PE=1 SV=2                                                       | Q93009 UBP7_HUMAN       | 128 kDa | 0 | 5  | 93  | 0 | 0,13 |
| Bcl-2-associated transcription factor 1 OS=Homo sapiens GN=BCLAF1 PE=1 SV=2                                                     | Q9NYF8 BCLF1_HUMAN      | 106 kDa | 0 | 4  | 77  | 0 | 0,13 |
| Transcription activator BRG1 OS=Homo sapiens GN=SMARCA4 PE=1 SV=2                                                               | P51532 SMCA4_HUMAN      | 185 kDa | 0 | 7  | 134 | 0 | 0,13 |
| RNA-binding protein 10 OS=Homo sapiens GN=RBM10 PE=1 SV=3                                                                       | P98175 RBM10_HUMAN      | 104 kDa | 0 | 4  | 76  | 0 | 0,13 |
| Eukaryotic translation initiation factor 4 gamma 2 OS=Homo sapiens GN=EIF4G2 PE=1 SV=1                                          | P78344 IF4G2_HUMAN      | 102 kDa | 0 | 4  | 74  | 0 | 0,13 |
| Periodic tryptophan protein 2 homolog OS=Homo sapiens GN=PWP2 PE=1 SV=2                                                         | Q15269 PWP2_HUMAN       | 102 kDa | 0 | 4  | 74  | 0 | 0,13 |
| Ataxin-10 OS=Homo sapiens GN=ATXN10 PE=1 SV=1                                                                                   | Q9UBB4 ATX10_HUMAN      | 53 kDa  | 0 | 2  | 39  | 0 | 0,13 |
| Long-chain-fatty-acid--CoA ligase 3 OS=Homo sapiens GN=ACSL3 PE=1 SV=3                                                          | O95573 ACSL3_HUMAN (+1) | 80 kDa  | 0 | 3  | 58  | 0 | 0,13 |
| DNA primase small subunit OS=Homo sapiens GN=PRIM1 PE=1 SV=1                                                                    | P49642 PRI1_HUMAN       | 50 kDa  | 0 | 2  | 37  | 0 | 0,13 |
| Protoporphyrinogen oxidase OS=Homo sapiens GN=PPOX PE=1 SV=1                                                                    | P50336 PPOX_HUMAN       | 51 kDa  | 0 | 2  | 38  | 0 | 0,13 |
| Annexin A7 OS=Homo sapiens GN=ANXA7 PE=1 SV=3                                                                                   | P20073 ANXA7_HUMAN      | 53 kDa  | 0 | 2  | 39  | 0 | 0,13 |
| DNA polymerase delta subunit 2 OS=Homo sapiens GN=POLD2 PE=1 SV=1                                                               | P49005 DPOD2_HUMAN      | 51 kDa  | 0 | 2  | 38  | 0 | 0,13 |
| Protein transport protein Sec61 subunit alpha isoform 1 OS=Homo sapiens GN=SEC61A1 PE=1 SV=2                                    | P61619 S61A1_HUMAN      | 52 kDa  | 0 | 2  | 38  | 0 | 0,13 |

|                                                                                                                      |                         |         |   |   |     |   |      |
|----------------------------------------------------------------------------------------------------------------------|-------------------------|---------|---|---|-----|---|------|
| Rho GTPase-activating protein 1 OS=Homo sapiens GN=ARHGAP1 PE=1 SV=1                                                 | Q07960 RHG01_HUMAN      | 50 kDa  | 0 | 2 | 37  | 0 | 0,13 |
| Lipoamide acyltransferase component of branched-chain alpha-keto acid dehydrogenase complex, mitochondrial O. P11182 | ODB2_HUMAN              | 53 kDa  | 0 | 2 | 39  | 0 | 0,13 |
| 116 kDa U5 small nuclear ribonucleoprotein component OS=Homo sapiens GN=EFTUD2 PE=1 SV=1                             | Q15029 U5S1_HUMAN       | 109 kDa | 0 | 4 | 79  | 0 | 0,12 |
| Structural maintenance of chromosomes protein 1A OS=Homo sapiens GN=SMC1A PE=1 SV=2                                  | Q14683 SMC1A_HUMAN      | 143 kDa | 0 | 5 | 104 | 0 | 0,12 |
| Proteasome-associated protein ECM29 homolog OS=Homo sapiens GN=ECM29 PE=1 SV=2                                       | Q5VYK3 ECM29_HUMAN      | 204 kDa | 0 | 7 | 148 | 0 | 0,12 |
| V-type proton ATPase subunit B, brain isoform OS=Homo sapiens GN=ATP6V1B2 PE=1 SV=3                                  | P21281 VATB2_HUMAN (+3) | 57 kDa  | 0 | 2 | 42  | 0 | 0,12 |
| Catenin beta-1 OS=Homo sapiens GN=CTNNB1 PE=1 SV=1                                                                   | P35222 CTNB1_HUMAN      | 85 kDa  | 0 | 3 | 62  | 0 | 0,12 |
| Interferon-induced protein with tetratricopeptide repeats 5 OS=Homo sapiens GN=IFIT5 PE=1 SV=1                       | Q13325 IFIT5_HUMAN      | 56 kDa  | 0 | 2 | 41  | 0 | 0,12 |
| E3 ubiquitin-protein ligase DTX3L OS=Homo sapiens GN=DTX3L PE=1 SV=1                                                 | Q8TDB6 DTX3L_HUMAN      | 84 kDa  | 0 | 3 | 61  | 0 | 0,12 |
| Aspartyl/asparaginyl beta-hydroxylase OS=Homo sapiens GN=ASPH PE=1 SV=3                                              | Q12797 ASPH_HUMAN       | 86 kDa  | 0 | 3 | 63  | 0 | 0,12 |
| Protein MB21D2 OS=Homo sapiens GN=MB21D2 PE=1 SV=3                                                                   | Q8IYB1 M21D2_HUMAN      | 56 kDa  | 0 | 2 | 41  | 0 | 0,12 |
| Aldehyde dehydrogenase X, mitochondrial OS=Homo sapiens GN=ALDH1B1 PE=1 SV=3                                         | P30837 AL1B1_HUMAN      | 57 kDa  | 0 | 2 | 42  | 0 | 0,12 |
| Bifunctional polynucleotide phosphatase/kinase OS=Homo sapiens GN=PNKP PE=1 SV=1                                     | Q96T60 PNKP_HUMAN       | 57 kDa  | 0 | 2 | 42  | 0 | 0,12 |
| Splicing factor 3B subunit 1 OS=Homo sapiens GN=SF3B1 PE=1 SV=3                                                      | O75533 SF3B1_HUMAN      | 146 kDa | 0 | 5 | 106 | 0 | 0,11 |
| DNA topoisomerase 2-beta OS=Homo sapiens GN=TOP2B PE=1 SV=3                                                          | Q02880 TOP2B_HUMAN      | 183 kDa | 0 | 6 | 133 | 0 | 0,11 |
| DNA polymerase delta catalytic subunit OS=Homo sapiens GN=POLD1 PE=1 SV=2                                            | P28340 DPOD1_HUMAN      | 124 kDa | 0 | 4 | 90  | 0 | 0,11 |
| AT-rich interactive domain-containing protein 1B OS=Homo sapiens GN=ARID1B PE=1 SV=2                                 | Q8NFD5 ARI1B_HUMAN      | 236 kDa | 0 | 8 | 171 | 0 | 0,11 |
| Pogo transposable element with ZNF domain OS=Homo sapiens GN=POGZ PE=1 SV=2                                          | Q7Z3K3 POGZ_HUMAN       | 155 kDa | 0 | 5 | 112 | 0 | 0,11 |
| Centromere/kinetochore protein zw10 homolog OS=Homo sapiens GN=ZW10 PE=1 SV=3                                        | O43264 ZW10_HUMAN       | 89 kDa  | 0 | 3 | 65  | 0 | 0,11 |
| La-related protein 1 OS=Homo sapiens GN=LARP1 PE=1 SV=2                                                              | Q6PKG0 LARP1_HUMAN      | 124 kDa | 0 | 4 | 90  | 0 | 0,11 |
| UDP-N-acetylhexosamine pyrophosphorylase OS=Homo sapiens GN=UAP1 PE=1 SV=3                                           | Q16222 UAP1_HUMAN (+1)  | 59 kDa  | 0 | 2 | 43  | 0 | 0,11 |
| Signal transducer and activator of transcription 3 OS=Homo sapiens GN=STAT3 PE=1 SV=2                                | P40763 STAT3_HUMAN      | 88 kDa  | 0 | 3 | 64  | 0 | 0,11 |
| NEDD8-activating enzyme E1 regulatory subunit OS=Homo sapiens GN=NAE1 PE=1 SV=1                                      | Q13564 ULA1_HUMAN       | 60 kDa  | 0 | 2 | 44  | 0 | 0,11 |
| Dolichyl-diphosphooligosaccharide--protein glycosyltransferase subunit STT3B OS=Homo sapiens GN=STT3B PE=1 SV=1      | Q8TCJ2 STT3B_HUMAN      | 94 kDa  | 0 | 3 | 68  | 0 | 0,11 |
| Ran-binding protein 3 OS=Homo sapiens GN=RANBP3 PE=1 SV=1                                                            | Q9H6Z4 RANB3_HUMAN      | 60 kDa  | 0 | 2 | 44  | 0 | 0,11 |
| Serine beta-lactamase-like protein LACTB, mitochondrial OS=Homo sapiens GN=LACTB PE=1 SV=2                           | P83111 LACTB_HUMAN      | 61 kDa  | 0 | 2 | 45  | 0 | 0,11 |
| Mitochondrial-processing peptidase subunit alpha OS=Homo sapiens GN=PMPCA PE=1 SV=2                                  | Q10713 MPPA_HUMAN       | 58 kDa  | 0 | 2 | 43  | 0 | 0,11 |
| EH domain-containing protein 1 OS=Homo sapiens GN=EHD1 PE=1 SV=2                                                     | Q9H4M9 EHD1_HUMAN       | 61 kDa  | 0 | 2 | 45  | 0 | 0,11 |
| Structural maintenance of chromosomes flexible hinge domain-containing protein 1 OS=Homo sapiens GN=SMCHD1           | A6NHR9 SMHD1_HUMAN      | 226 kDa | 0 | 7 | 164 | 0 | 0,1  |
| HEAT repeat-containing protein 1 OS=Homo sapiens GN=HEATR1 PE=1 SV=3                                                 | Q9H583 HEAT1_HUMAN      | 242 kDa | 0 | 7 | 175 | 0 | 0,1  |
| Protein RRP5 homolog OS=Homo sapiens GN=PDCD11 PE=1 SV=3                                                             | Q14690 RRP5_HUMAN       | 209 kDa | 0 | 6 | 151 | 0 | 0,1  |
| Unconventional myosin-Ib OS=Homo sapiens GN=MYO1B PE=2 SV=3                                                          | O43795 MYO1B_HUMAN      | 132 kDa | 0 | 4 | 96  | 0 | 0,1  |
| Coilin OS=Homo sapiens GN=COIL PE=1 SV=1                                                                             | P38432 COIL_HUMAN       | 63 kDa  | 0 | 2 | 46  | 0 | 0,1  |
| Replication factor C subunit 1 OS=Homo sapiens GN=RFC1 PE=1 SV=4                                                     | P35251 RFC1_HUMAN       | 128 kDa | 0 | 4 | 93  | 0 | 0,1  |
| Bifunctional protein NCOAT OS=Homo sapiens GN=MGEA5 PE=1 SV=2                                                        | O60502 NCOAT_HUMAN      | 103 kDa | 0 | 3 | 75  | 0 | 0,1  |
| RNA-binding protein EWS OS=Homo sapiens GN=EWSR1 PE=1 SV=1                                                           | Q01844 EWS_HUMAN        | 68 kDa  | 0 | 2 | 50  | 0 | 0,1  |
| Negative elongation factor B OS=Homo sapiens GN=COBRA1 PE=1 SV=1                                                     | Q8WX92 NELFB_HUMAN      | 66 kDa  | 0 | 2 | 48  | 0 | 0,1  |
| Serrate RNA effector molecule homolog OS=Homo sapiens GN=SRRT PE=1 SV=1                                              | Q9BXP5 SRRT_HUMAN       | 101 kDa | 0 | 3 | 73  | 0 | 0,1  |
| FAD synthase OS=Homo sapiens GN=FLAD1 PE=1 SV=1                                                                      | Q8NFF5 FAD1_HUMAN       | 65 kDa  | 0 | 2 | 48  | 0 | 0,1  |
| Double-stranded RNA-binding protein Staufen homolog 1 OS=Homo sapiens GN=STAU1 PE=1 SV=2                             | O95793 STAU1_HUMAN      | 63 kDa  | 0 | 2 | 46  | 0 | 0,1  |
| Beta-catenin-like protein 1 OS=Homo sapiens GN=CTNNB1 PE=1 SV=1                                                      | Q8WYA6 CTBL1_HUMAN (+3) | 65 kDa  | 0 | 2 | 48  | 0 | 0,1  |
| Sister chromatid cohesion protein PDS5 homolog A OS=Homo sapiens GN=PDS5A PE=1 SV=1                                  | Q29RF7 PDS5A_HUMAN      | 151 kDa | 0 | 4 | 110 | 0 | 0,09 |
| Condensin complex subunit 3 OS=Homo sapiens GN=NCAPG PE=1 SV=1                                                       | Q9BPX3 CND3_HUMAN       | 114 kDa | 0 | 3 | 83  | 0 | 0,09 |
| UDP-glucose:glycoprotein glucosyltransferase 1 OS=Homo sapiens GN=UGGT1 PE=1 SV=3                                    | Q9NYU2 UGGG1_HUMAN      | 177 kDa | 0 | 5 | 128 | 0 | 0,09 |
| Endoplasmic reticulum aminopeptidase 1 OS=Homo sapiens GN=ERAP1 PE=1 SV=3                                            | Q9NZ08 ERAP1_HUMAN      | 107 kDa | 0 | 3 | 78  | 0 | 0,09 |
| Apoptotic chromatin condensation inducer in the nucleus OS=Homo sapiens GN=ACIN1 PE=1 SV=2                           | Q9UKV3 ACINU_HUMAN      | 152 kDa | 0 | 4 | 110 | 0 | 0,09 |
| Protein flightless-1 homolog OS=Homo sapiens GN=FLII PE=1 SV=2                                                       | Q13045 FLII_HUMAN       | 145 kDa | 0 | 4 | 105 | 0 | 0,09 |
| Nuclear pore complex protein Nup155 OS=Homo sapiens GN=NUP155 PE=1 SV=1                                              | O75694 NU155_HUMAN      | 155 kDa | 0 | 4 | 112 | 0 | 0,09 |
| 5'-3' exoribonuclease 2 OS=Homo sapiens GN=XRN2 PE=1 SV=1                                                            | Q9H0D6 XRN2_HUMAN       | 109 kDa | 0 | 3 | 79  | 0 | 0,09 |
| Fragile X mental retardation syndrome-related protein 1 OS=Homo sapiens GN=FXR1 PE=1 SV=3                            | P51114 FXR1_HUMAN       | 70 kDa  | 0 | 2 | 51  | 0 | 0,09 |
| DnaJ homolog subfamily C member 2 OS=Homo sapiens GN=DNAJC2 PE=1 SV=4                                                | Q99543 DNJC2_HUMAN      | 72 kDa  | 0 | 2 | 53  | 0 | 0,09 |
| Pumilio domain-containing protein KIAA0020 OS=Homo sapiens GN=KIAA0020 PE=1 SV=3                                     | Q15397 K0020_HUMAN      | 74 kDa  | 0 | 2 | 54  | 0 | 0,09 |
| Histone acetyltransferase KAT7 OS=Homo sapiens GN=KAT7 PE=1 SV=1                                                     | O95251 KAT7_HUMAN       | 71 kDa  | 0 | 2 | 52  | 0 | 0,09 |
| Serine/threonine-protein phosphatase 2A 56 kDa regulatory subunit delta isoform OS=Homo sapiens GN=PPP2R5D           | Q14738 2A5D_HUMAN (+1)  | 70 kDa  | 0 | 2 | 51  | 0 | 0,09 |
| Host cell factor 1 OS=Homo sapiens GN=HCFC1 PE=1 SV=2                                                                | P51610 HCFC1_HUMAN      | 209 kDa | 0 | 5 | 151 | 0 | 0,08 |
| YLP motif-containing protein 1 OS=Homo sapiens GN=YLPM1 PE=1 SV=3                                                    | P49750 YLPM1_HUMAN      | 220 kDa | 0 | 5 | 159 | 0 | 0,08 |
| DnaJ homolog subfamily C member 13 OS=Homo sapiens GN=DNAJC13 PE=1 SV=5                                              | O75165 DJC13_HUMAN      | 254 kDa | 0 | 6 | 184 | 0 | 0,08 |
| Probable ubiquitin carboxyl-terminal hydrolase FAF-X OS=Homo sapiens GN=USP9X PE=1 SV=3                              | Q93008 USP9X_HUMAN      | 292 kDa | 0 | 7 | 211 | 0 | 0,08 |
| Activity-dependent neuroprotector homeobox protein OS=Homo sapiens GN=ADNP PE=1 SV=1                                 | Q9H2P0 ADNP_HUMAN       | 124 kDa | 0 | 3 | 90  | 0 | 0,08 |



|                                                                                                              |                         |         |   |    |     |   |      |
|--------------------------------------------------------------------------------------------------------------|-------------------------|---------|---|----|-----|---|------|
| SWI/SNF complex subunit SMARCC1 OS=Homo sapiens GN=SMARCC1 PE=1 SV=3                                         | Q92922 SMRC1_HUMAN      | 123 kDa | 0 | 3  | 89  | 0 | 0,08 |
| CLIP-associating protein 1 OS=Homo sapiens GN=CLASP1 PE=1 SV=1                                               | Q7Z460 CLAP1_HUMAN      | 169 kDa | 0 | 4  | 122 | 0 | 0,08 |
| Kinesin-like protein KIF11 OS=Homo sapiens GN=KIF11 PE=1 SV=2                                                | P52732 KIF11_HUMAN      | 119 kDa | 0 | 3  | 87  | 0 | 0,08 |
| Oxysterol-binding protein-related protein 10 OS=Homo sapiens GN=OSBPL10 PE=1 SV=2                            | Q9BXB5 OSB10_HUMAN      | 84 kDa  | 0 | 2  | 61  | 0 | 0,08 |
| Condensin complex subunit 2 OS=Homo sapiens GN=NCAPH PE=1 SV=3                                               | Q15003 CND2_HUMAN       | 83 kDa  | 0 | 2  | 61  | 0 | 0,08 |
| Protein transport protein Sec24C OS=Homo sapiens GN=SEC24C PE=1 SV=3                                         | P53992 SC24C_HUMAN      | 118 kDa | 0 | 3  | 86  | 0 | 0,08 |
| Nucleolar complex protein 2 homolog OS=Homo sapiens GN=NOC2L PE=1 SV=4                                       | Q9Y3T9 NOC2L_HUMAN      | 85 kDa  | 0 | 2  | 62  | 0 | 0,08 |
| Large proline-rich protein BAG6 OS=Homo sapiens GN=BAG6 PE=1 SV=2                                            | P46379 BAG6_HUMAN       | 119 kDa | 0 | 3  | 87  | 0 | 0,08 |
| CCAAT/enhancer-binding protein zeta OS=Homo sapiens GN=CEBPZ PE=1 SV=3                                       | Q03701 CEBPZ_HUMAN      | 121 kDa | 0 | 3  | 88  | 0 | 0,08 |
| FAST kinase domain-containing protein 2 OS=Homo sapiens GN=FASTKD2 PE=1 SV=1                                 | Q9NYY8 FAKD2_HUMAN      | 81 kDa  | 0 | 2  | 59  | 0 | 0,08 |
| NADH-ubiquinone oxidoreductase 75 kDa subunit, mitochondrial OS=Pongo pygmaeus GN=NDUFS1 PE=2 SV=1           | P0CB68 NDUS1_PONPY (+4) | 79 kDa  | 0 | 2  | 58  | 0 | 0,08 |
| 6-phosphofructokinase type C OS=Homo sapiens GN=PFKP PE=1 SV=2                                               | Q01813 K6PP_HUMAN       | 86 kDa  | 0 | 2  | 63  | 0 | 0,08 |
| ATP-binding cassette sub-family F member 3 OS=Homo sapiens GN=ABCF3 PE=1 SV=2                                | Q9NUQ8 ABCF3_HUMAN      | 80 kDa  | 0 | 2  | 58  | 0 | 0,08 |
| E3 ubiquitin-protein ligase UBR4 OS=Homo sapiens GN=UBR4 PE=1 SV=1                                           | Q5T4S7 UBR4_HUMAN       | 574 kDa | 0 | 12 | 414 | 0 | 0,07 |
| CCR4-NOT transcription complex subunit 1 OS=Homo sapiens GN=CNOT1 PE=1 SV=2                                  | A5YKK6 CNOT1_HUMAN      | 267 kDa | 0 | 6  | 193 | 0 | 0,07 |
| THO complex subunit 2 OS=Homo sapiens GN=THOC2 PE=1 SV=2                                                     | Q8NI27 THOC2_HUMAN      | 183 kDa | 0 | 4  | 133 | 0 | 0,07 |
| DNA-directed RNA polymerase II subunit RPB2 OS=Homo sapiens GN=POLR2B PE=1 SV=1                              | P30876 RPB2_HUMAN       | 134 kDa | 0 | 3  | 97  | 0 | 0,07 |
| Fanconi anemia group I protein OS=Homo sapiens GN=FANCI PE=1 SV=4                                            | Q9NVI1 FANCI_HUMAN      | 149 kDa | 0 | 3  | 108 | 0 | 0,07 |
| Nuclear pore complex protein Nup205 OS=Homo sapiens GN=NUP205 PE=1 SV=3                                      | Q92621 NU205_HUMAN      | 228 kDa | 0 | 5  | 165 | 0 | 0,07 |
| Valine--tRNA ligase OS=Homo sapiens GN=VAR5 PE=1 SV=4                                                        | P26640 SYVC_HUMAN       | 140 kDa | 0 | 3  | 102 | 0 | 0,07 |
| Cold shock domain-containing protein E1 OS=Homo sapiens GN=CSDE1 PE=1 SV=2                                   | O75534 CSDE1_HUMAN      | 89 kDa  | 0 | 2  | 65  | 0 | 0,07 |
| Transcription intermediary factor 1-beta OS=Homo sapiens GN=TRIM28 PE=1 SV=5                                 | Q13263 TIF1B_HUMAN      | 89 kDa  | 0 | 2  | 65  | 0 | 0,07 |
| Probable ATP-dependent RNA helicase DHX40 OS=Homo sapiens GN=DHX40 PE=1 SV=2                                 | Q8IX18 DHX40_HUMAN      | 89 kDa  | 0 | 2  | 65  | 0 | 0,07 |
| AFG3-like protein 2 OS=Bos taurus GN=AFG3L2 PE=2 SV=1                                                        | Q2KJI7 AFG32_BOVIN (+2) | 89 kDa  | 0 | 2  | 65  | 0 | 0,07 |
| Heterogeneous nuclear ribonucleoprotein U-like protein 1 OS=Mus musculus GN=Hnrnpul1 PE=1 SV=1               | Q8VDM6 HNRL1_MOUSE (+1) | 96 kDa  | 0 | 2  | 70  | 0 | 0,07 |
| Serine/threonine-protein kinase greatwall OS=Homo sapiens GN=MASTL PE=1 SV=1                                 | Q96GX5 GWL_HUMAN        | 97 kDa  | 0 | 2  | 71  | 0 | 0,07 |
| RecName: Full=Chromosome alignment-maintaining phosphoprotein 1;                                             | Q96JM3 ZN828_HUMAN      | 89 kDa  | 0 | 2  | 65  | 0 | 0,07 |
| Serine/threonine-protein phosphatase 1 regulatory subunit 10 OS=Homo sapiens GN=PPP1R10 PE=1 SV=1            | Q96QC0 PP1RA_HUMAN (+5) | 99 kDa  | 0 | 2  | 72  | 0 | 0,07 |
| Nuclear factor NF-kappa-B p100 subunit OS=Homo sapiens GN=NFKB2 PE=1 SV=4                                    | Q00653 NFKB2_HUMAN      | 97 kDa  | 0 | 2  | 71  | 0 | 0,07 |
| Probable E3 ubiquitin-protein ligase TRIP12 OS=Homo sapiens GN=TRIP12 PE=1 SV=1                              | Q14669 TRIPC_HUMAN      | 220 kDa | 0 | 4  | 159 | 0 | 0,06 |
| Poly [ADP-ribose] polymerase 14 OS=Homo sapiens GN=PARP14 PE=1 SV=3                                          | Q460N5 PAR14_HUMAN      | 203 kDa | 0 | 4  | 147 | 0 | 0,06 |
| Testis-expressed sequence 10 protein OS=Homo sapiens GN=TEX10 PE=1 SV=2                                      | Q9NXF1 TEX10_HUMAN      | 106 kDa | 0 | 2  | 77  | 0 | 0,06 |
| Ankyrin repeat domain-containing protein 17 OS=Homo sapiens GN=ANKRD17 PE=1 SV=3                             | O75179 ANR17_HUMAN      | 274 kDa | 0 | 5  | 198 | 0 | 0,06 |
| Scaffold attachment factor B1 OS=Homo sapiens GN=SAFB1 PE=1 SV=4                                             | Q15424 SAFB1_HUMAN      | 103 kDa | 0 | 2  | 75  | 0 | 0,06 |
| Probable ATP-dependent RNA helicase DHX36 OS=Homo sapiens GN=DHX36 PE=1 SV=2                                 | Q9H2U1 DHX36_HUMAN      | 115 kDa | 0 | 2  | 84  | 0 | 0,06 |
| Golgi-specific brefeldin A-resistance guanine nucleotide exchange factor 1 OS=Homo sapiens GN=GBF1 PE=1 SV=2 | Q92538 GBF1_HUMAN       | 206 kDa | 0 | 4  | 149 | 0 | 0,06 |
| Calcium homeostasis endoplasmic reticulum protein OS=Homo sapiens GN=CHERP PE=1 SV=3                         | Q8IWX8 CHERP_HUMAN      | 104 kDa | 0 | 2  | 76  | 0 | 0,06 |
| Lon protease homolog, mitochondrial OS=Homo sapiens GN=LONP1 PE=1 SV=2                                       | P36776 LONM_HUMAN (+1)  | 106 kDa | 0 | 2  | 77  | 0 | 0,06 |
| Exosome complex exonuclease RRP44 OS=Homo sapiens GN=DIS3 PE=1 SV=2                                          | Q9Y2L1 RRP44_HUMAN      | 109 kDa | 0 | 2  | 79  | 0 | 0,06 |
| Sister chromatid cohesion protein PDS5 homolog B OS=Homo sapiens GN=PDS5B PE=1 SV=1                          | Q9NTI5 PDS5B_HUMAN      | 165 kDa | 0 | 3  | 120 | 0 | 0,06 |
| Alpha-actinin-4 OS=Homo sapiens GN=ACTN4 PE=1 SV=2                                                           | O43707 ACTN4_HUMAN      | 105 kDa | 0 | 2  | 76  | 0 | 0,06 |
| Serine/threonine-protein phosphatase 4 regulatory subunit 1 OS=Homo sapiens GN=PPP4R1 PE=1 SV=1              | Q8TF05 PP4R1_HUMAN (+2) | 107 kDa | 0 | 2  | 78  | 0 | 0,06 |
| N-acetyltransferase 10 OS=Homo sapiens GN=NAT10 PE=1 SV=2                                                    | Q9H0A0 NAT10_HUMAN      | 116 kDa | 0 | 2  | 84  | 0 | 0,06 |
| E3 SUMO-protein ligase RanBP2 OS=Homo sapiens GN=RANBP2 PE=1 SV=2                                            | P49792 RBP2_HUMAN       | 358 kDa | 0 | 5  | 259 | 0 | 0,05 |
| Spectrin beta chain, brain 1 OS=Homo sapiens GN=SPTBN1 PE=1 SV=2                                             | Q01082 SPTB2_HUMAN      | 275 kDa | 0 | 4  | 199 | 0 | 0,05 |
| SURP and G-patch domain-containing protein 2 OS=Homo sapiens GN=SUGP2 PE=1 SV=2                              | Q8IX01 SUGP2_HUMAN      | 120 kDa | 0 | 2  | 87  | 0 | 0,05 |
| AP-3 complex subunit beta-1 OS=Homo sapiens GN=AP3B1 PE=1 SV=3                                               | O00203 AP3B1_HUMAN      | 121 kDa | 0 | 2  | 88  | 0 | 0,05 |
| Wings apart-like protein homolog OS=Homo sapiens GN=WAPAL PE=1 SV=1                                          | Q7Z5K2 WAPL_HUMAN       | 133 kDa | 0 | 2  | 97  | 0 | 0,05 |
| Nuclear pore complex protein Nup133 OS=Homo sapiens GN=NUP133 PE=1 SV=2                                      | Q8WUM0 NU133_HUMAN      | 129 kDa | 0 | 2  | 94  | 0 | 0,05 |
| Tight junction protein ZO-2 OS=Homo sapiens GN=TJP2 PE=1 SV=2                                                | Q9UDY2 ZO2_HUMAN        | 134 kDa | 0 | 2  | 97  | 0 | 0,05 |
| Ubiquitin-conjugating enzyme E2 O OS=Homo sapiens GN=UBE2O PE=1 SV=3                                         | Q9C0C9 UBE2O_HUMAN      | 141 kDa | 0 | 2  | 102 | 0 | 0,05 |
| Dynactin subunit 1 OS=Homo sapiens GN=DCTN1 PE=1 SV=3                                                        | Q14203 DCTN1_HUMAN      | 142 kDa | 0 | 2  | 103 | 0 | 0,05 |
| RNA-binding protein 27 OS=Homo sapiens GN=RBM27 PE=1 SV=2                                                    | Q9P2N5 RBM27_HUMAN      | 119 kDa | 0 | 2  | 87  | 0 | 0,05 |
| Importin-8 OS=Homo sapiens GN=IPO8 PE=1 SV=2                                                                 | O15397 IPO8_HUMAN       | 120 kDa | 0 | 2  | 87  | 0 | 0,05 |
| Symplekin OS=Homo sapiens GN=SYMPK PE=1 SV=2                                                                 | Q92797 SYMPK_HUMAN      | 141 kDa | 0 | 2  | 102 | 0 | 0,05 |
| RNA-binding protein 33 OS=Homo sapiens GN=RBM33 PE=1 SV=3                                                    | Q96EV2 RBM33_HUMAN      | 130 kDa | 0 | 2  | 94  | 0 | 0,05 |
| Condensin complex subunit 1 OS=Homo sapiens GN=NCAPD2 PE=1 SV=3                                              | Q15021 CND1_HUMAN       | 157 kDa | 0 | 2  | 114 | 0 | 0,04 |
| Death-inducer obliterator 1 OS=Homo sapiens GN=DIDO1 PE=1 SV=5                                               | Q9BTC0 DIDO1_HUMAN      | 244 kDa | 0 | 3  | 176 | 0 | 0,04 |
| Chromodomain-helicase-DNA-binding protein 7 OS=Homo sapiens GN=CHD7 PE=1 SV=3                                | Q9P2D1 CHD7_HUMAN       | 336 kDa | 0 | 4  | 243 | 0 | 0,04 |

|                                                                                          |                         |         |   |   |     |   |      |
|------------------------------------------------------------------------------------------|-------------------------|---------|---|---|-----|---|------|
| Pre-mRNA cleavage complex 2 protein Pcf11 OS=Homo sapiens GN=PCF11 PE=1 SV=3             | O94913 PCF11_HUMAN      | 173 kDa | 0 | 2 | 125 | 0 | 0,04 |
| Rho-associated protein kinase 2 OS=Homo sapiens GN=ROCK2 PE=1 SV=4                       | O75116 ROCK2_HUMAN      | 161 kDa | 0 | 2 | 117 | 0 | 0,04 |
| Nestin OS=Homo sapiens GN=NES PE=1 SV=2                                                  | P48681 NEST_HUMAN       | 177 kDa | 0 | 2 | 128 | 0 | 0,04 |
| Tyrosine-protein kinase BAZ1B OS=Homo sapiens GN=BAZ1B PE=1 SV=2                         | Q9UIG0 BAZ1B_HUMAN      | 171 kDa | 0 | 2 | 124 | 0 | 0,04 |
| Protein furry homolog-like OS=Homo sapiens GN=FRYL PE=1 SV=2                             | O94915 FRYL_HUMAN       | 340 kDa | 0 | 3 | 246 | 0 | 0,03 |
| Nucleoporin NUP188 homolog OS=Homo sapiens GN=NUP188 PE=1 SV=1                           | Q5SRE5 NU188_HUMAN      | 196 kDa | 0 | 2 | 142 | 0 | 0,03 |
| PHD finger protein 3 OS=Homo sapiens GN=PHF3 PE=1 SV=3                                   | Q92576 PHF3_HUMAN       | 229 kDa | 0 | 2 | 166 | 0 | 0,03 |
| Triple functional domain protein OS=Homo sapiens GN=TRIO PE=1 SV=2                       | O75962 TRIO_HUMAN       | 347 kDa | 0 | 3 | 251 | 0 | 0,03 |
| E3 ubiquitin-protein ligase listerin OS=Homo sapiens GN=LTN1 PE=1 SV=6                   | O94822 LTN1_HUMAN       | 201 kDa | 0 | 2 | 145 | 0 | 0,03 |
| Nuclear pore complex protein Nup98-Nup96 OS=Homo sapiens GN=NUP98 PE=1 SV=4              | P52948 NUP98_HUMAN      | 198 kDa | 0 | 2 | 143 | 0 | 0,03 |
| Tight junction protein ZO-1 OS=Homo sapiens GN=TJP1 PE=1 SV=3                            | Q07157 ZO1_HUMAN        | 195 kDa | 0 | 2 | 141 | 0 | 0,03 |
| Zinc finger protein 638 OS=Homo sapiens GN=ZNF638 PE=1 SV=2                              | Q14966 ZN638_HUMAN      | 221 kDa | 0 | 2 | 160 | 0 | 0,03 |
| Bromodomain adjacent to zinc finger domain protein 2A OS=Homo sapiens GN=BAZ2A PE=1 SV=4 | Q9UIF9 BAZ2A_HUMAN      | 211 kDa | 0 | 2 | 153 | 0 | 0,03 |
| Ankyrin repeat and KH domain-containing protein 1 OS=Homo sapiens GN=ANKHD1 PE=1 SV=1    | Q8IWZ3 ANKH1_HUMAN      | 269 kDa | 0 | 2 | 194 | 0 | 0,02 |
| Filamin-B OS=Homo sapiens GN=FLNB PE=1 SV=2                                              | O75369 FLNB_HUMAN       | 278 kDa | 0 | 2 | 201 | 0 | 0,02 |
| Histone-lysine N-methyltransferase MLL OS=Homo sapiens GN=MLL PE=1 SV=5                  | Q03164 MLL1_HUMAN       | 432 kDa | 0 | 2 | 312 | 0 | 0,01 |
| Microtubule-actin cross-linking factor 1, isoform 4 OS=Homo sapiens GN=MACF1 PE=1 SV=2   | Q96PK2 MACF4_HUMAN (+1) | 670 kDa | 0 | 3 | 483 | 0 | 0,01 |
