# Supplementary material
Source: publisher figshare collection journal article supplement (https://tandf.figshare.com/articles/dataset/_/4822102)

# Supplementary Figure 3

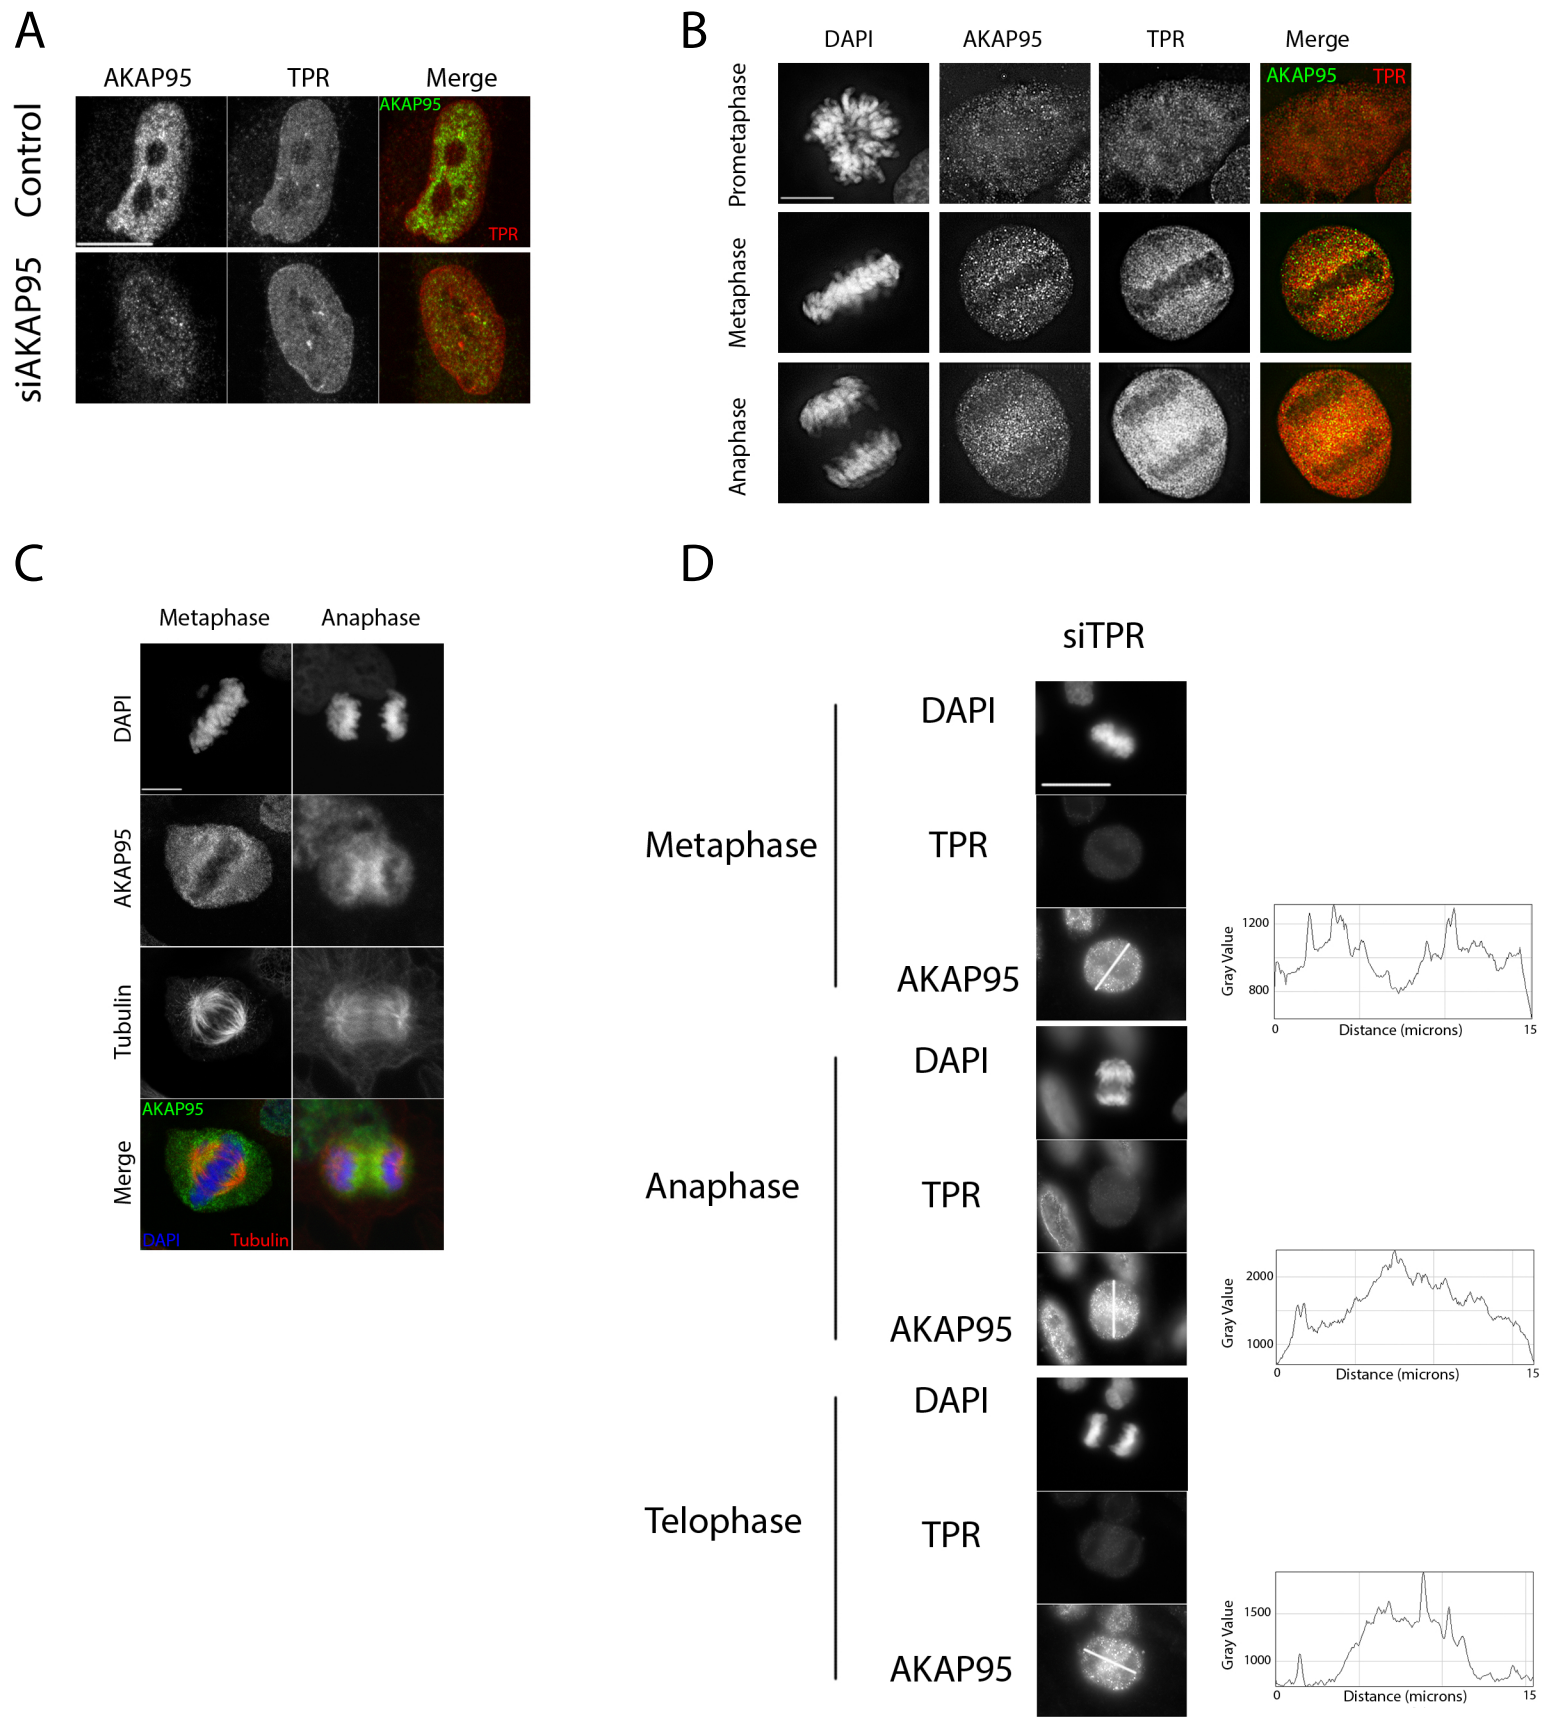

Supplement: Supplementary file 2 [file 2]

# Supplementary Figure 1

A

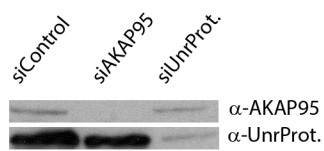

B

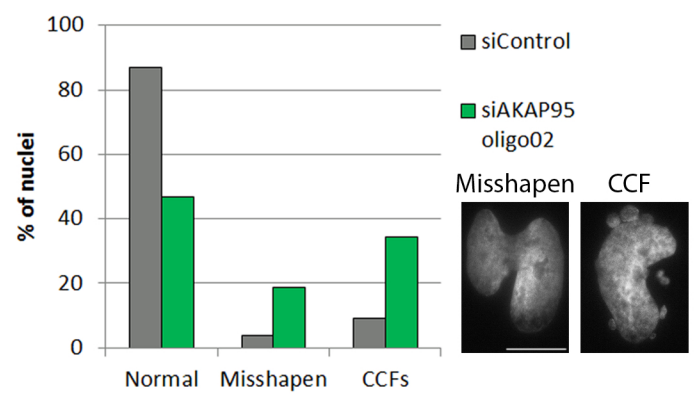

C

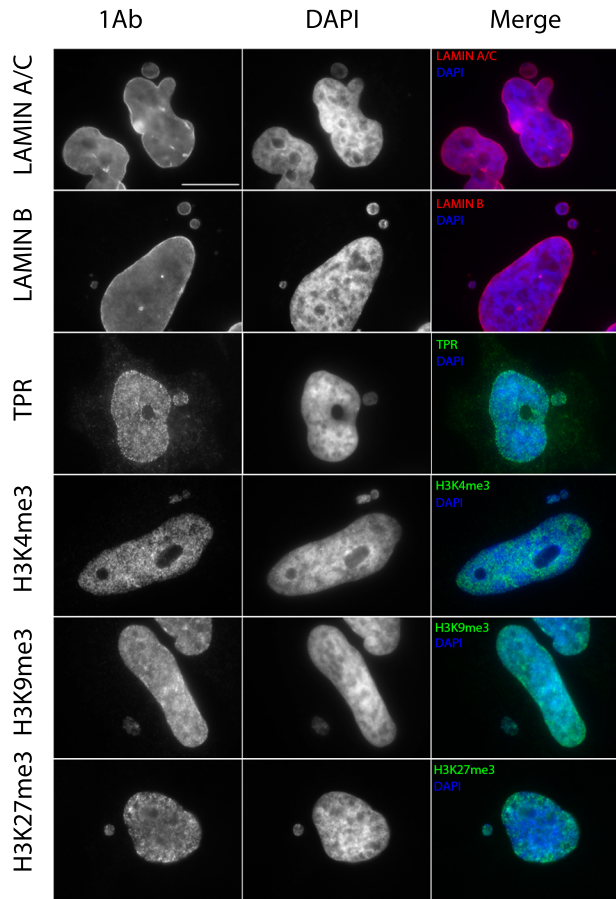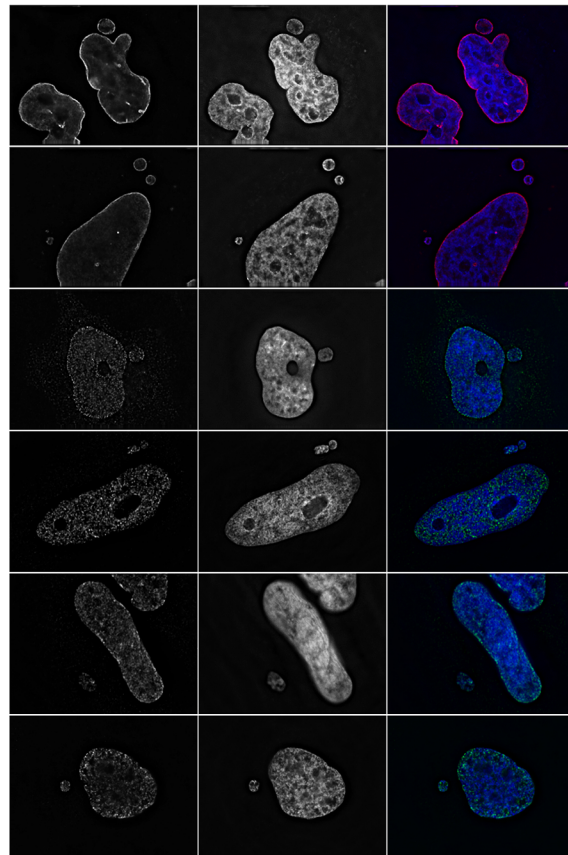

D

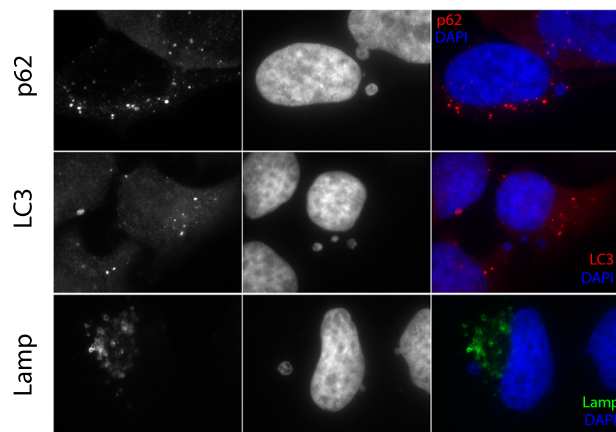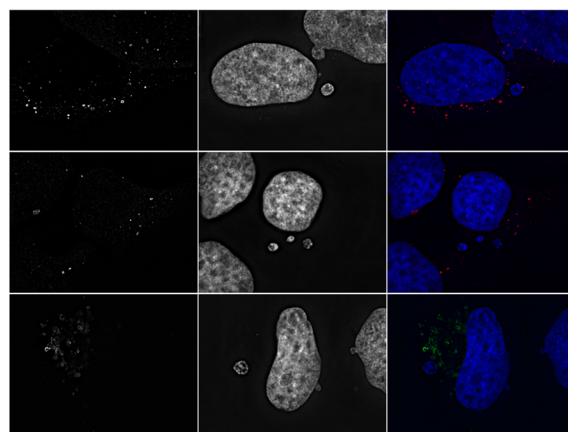

E

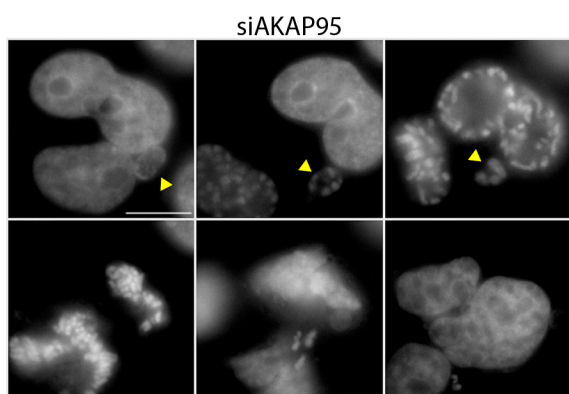

Supplement: Supplementary file 4 [file 2]
